# Supplementary material for: On the fine vertical structure of the low troposphere over the coastal margins of East Antarctica
Source: Copernicus journal article supplement (doi:10.5194/acp-2018-1197), 2019-01-02
Supplement: Supplementary file [file acp-2018-1197-RC2-supplement.pdf]

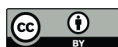

# On the fine vertical structure of the low troposphere over the coastal margins of East Antarctica

Étienne Vignon<sup>1</sup>, Olivier Traullé<sup>2</sup>, and Alexis Berne<sup>1</sup>

<sup>1</sup>Environmental Remote Sensing Laboratory (LTE), École Polytechnique Fédérale de Lausanne (EPFL), Lausanne, Switzerland

<sup>2</sup>DSO-DOA, Météo France, Toulouse, France

**Abstract.** Eight years of high-resolution radiosonde data at nine Antarctic stations are analysed to provide the first large scale characterization of the fine scale vertical structure of the low troposphere up to 3 km of altitude over the coastal margins of East Antarctica. Radiosonde data show a large spatial variability of wind, temperature and humidity profiles, with different features between stations in katabatic regions (e.g., Dumont d'Urville and Mawson stations), stations over two ice shelves (Neumayer and Halley stations) and regions with complex orography (e.g., Mc Murdo). At Dumont d'Urville, Mawson and Davis stations, the yearly median wind speed profiles exhibit a clear low-level katabatic jet. During precipitation events, the low-level flow generally remains of continental origin and its speed is even reinforced due to the increase in the continent-ocean pressure gradient. Meanwhile, the relative humidity profiles show a dry low troposphere, suggesting the occurrence of low-level sublimation of precipitation in katabatic regions but such a phenomenon does not appreciably occur over the ice-shelves near Halley and Neumayer. Although ERA-Interim and ERA5 reanalyses assimilate radiosoundings at most stations considered here, substantial - and sometimes large - low-level wind and humidity biases are revealed but ERA5 shows overall better performances. A free simulation with the regional model Polar WRF (at a 35-km resolution) over the entire continent shows too strong and too shallow near-surface jets in katabatic regions especially in winter. This may be a consequence of an underestimated coastal cold air bump and associated sea-continent pressure gradient force due to the coarse 35 km resolution of the Polar WRF simulation. Beyond documenting the vertical structure of the low troposphere over coastal East-Antarctica, this study gives insights into the reliability and accuracy of two major reanalysis products in this region on the Earth and it raises the difficulty of modeling the low-level flow over the margins of the ice sheet with a state-of-the-art climate model.

## 1 Introduction

The margins of East-Antarctica are a region of great interest in meteorology particularly owing to the fierce katabatic winds that fascinated and severely tested the pioneering scientific expeditions in the far south. These so-called katabatic winds that flow over the sloping surfaces of the ice-sheet can reach very high speeds in confluence regions such as the Adélie Land (Mawson, 1915; Wendler et al., 1993; Parish and Walker, 2006) or the Lambert glacier (Parish and Bromwich, 1987).

In winter, the strong radiative deficit of the surface leads to persistent, intense and directionally-constant near-surface winds from the interior of the continent. ~~Once the coastal slopes have been passed~~ the atmospheric boundary layer flow considerably

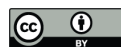

thickens in [association](#) to a piling-up of cold air downstream over the sea-ice or the ice-shelves. This accumulation of cold air is responsible for a pressure gradient force opposing the katabatic wind that is particularly intense under weak synoptic forcing (Van den Broeke et al., 2002; Van den Broeke and Van Lipzig, 2003). The flow regime transition can be abrupt (Petté and André, 1991; Gallée et al., 1996; Gallée and Petté, 1998; Renfrew, 2004) and is therefore interpreted as a katabatic jump or

5 Loewe's phenomenon.

In summer the absorption of shortwave radiation by the surface diminishes the katabatic forcing and the large-scale pressure gradient force dominates the overall momentum budget of the boundary-layer (Van den Broeke et al., 2002). The lower sea-ice concentration and sea-ice extent generally diminish the offshore extent of the land flow [Petté et al. \(1993\)](#) due to the development of diurnal sea-breezes and because of the thermal and mechanical erosion of the flow at the ocean surface. In Adélie

10 Land and in Queen Maud Land, a typical summertime diurnal cycle of the low-level flow has been evidenced. Nocturnal katabatic forcing alternates [with a combination of thermal wind forcing with surface radiative](#) heating that leads to a weakening of downslope diurnal flow or even to a diurnal anabatic flow (Gallée and Petté, 1998; Parish et al., 1993; Bintanja, 2000).

The interactions between the low-level atmospheric flow from the interior of the ice-sheet and the oceanic air masses over - or coming from - the austral ocean are varied and complex. For instance, it has been shown that katabatic winds are stronger

15 when an anticyclone sets over the Plateau or when the pressure over the ocean is low as during the approach of deep cyclones (Parish and Bromwich, 1998; Naithani et al., 2003a; Orr et al., 2014). On another hand, katabatic winds have been shown to be a key driver of the mesoscale cyclogenesis off Adélie Land and the Ross sea (Gallée and Schayes, 1994; Bromwich et al., 2011) or over the Weddell sea (Carrasco et al., 2003).

From a meteorological and climate perspective, the low-level atmospheric dynamics over the coastal margins of Antarctica

20 plays a key role for the energy and mass budgets of the atmosphere over the ice-sheet. The low-level horizontally diverging and northward drainage flow from Antarctica drives a thermally direct zonal circulation. Subsidence - and associated upper cyclonic vorticity - takes place over the central ice-sheet while rising motions occur over the ocean leading to an active mass exchange between Antarctica and subpolar latitudes (Parish and Bromwich, 1998, 2007). Moreover the low-level circulation over coastal Antarctica is critical for the surface mass balance of the ice sheet. While transient eddies are responsible for the

25 moisture transport towards the continent, the export of moisture by the mean circulation mostly occurs in the low troposphere (Connolley and King, 1993; Van Lipzig and Van Den Broeke, 2002; Genthon and Krinner, 1998; Dufour et al., 2018). This export can be even more pronounced when considering the moisture export due to blowing snow in the boundary layer (Lenaerts et al., 2012). Using radar measurements and model simulations, Grazioli et al. (2017b) further [show](#) that katabatic winds significantly diminish the precipitation amount that actually reaches the ice sheet surface. As katabatic winds are relatively dry,

30 they sublime an important part of the snowfall before the [latter](#) reaches the ground surface. This dry layer manifests with low values of relative humidity in the boundary-layer during snowfall events. From a model simulation with the Integrated Forecast Model (IFS), the authors estimate that sublimation corresponds to 17 % of the precipitation over the entire continent. This term reaches up to 35% when considering only the margins of the ice sheet.

The reliable representation of the Antarctic climate by regional and global climate models as well as atmospheric reanalyses

35 therefore strongly depends on their ability to reproduce the low-level atmospheric flow at the Antarctic periphery. A signif-



icant body of literature has focused on the near-surface atmosphere in Antarctica (Parish and Bromwich, 2007; Nicolas and Bromwich, 2014; Bracegirdle and Marshall, 2012) and its representation in meteorological reanalyses and models. In particular, Sanz Rodrigo et al. (2013) have stressed that the near surface wind speed in escarpment areas are strongly underestimated in ERA40 and ERA-Interim reanalyses and to a lesser extent in model simulations with RACMO. The simulations with the EC-Earth global climate model in Bintanja et al. (2014) and in the LMDZ general circulation model in Vignon et al. (2018) concur with these conclusions, especially at low horizontal resolution due to the coarse representation of terrain slopes.

The vertical structure of the atmosphere over the coastal regions of the ice sheet and its representation by models have been less documented. Using radiosonde data, Streten (1990) and König-Langlo et al. (1998) study the climatological structure of the whole troposphere and low stratosphere at Mawson and Dumont d'Urville (hereafter DDU), Neumayer and Halley stations respectively but they do not focus on the first hundreds meters above the surface. Significant advances in our understanding of the low-level flow have been achieved thanks to case studies - often in summer - using a combination of tethered sonde and radiosonde observations (e.g. Sorbjan et al., 1986; Bintanja, 2000) and by the deployment of sodars in Coats Land (Renfrew and Anderson, 2007), in Adélie Land (Argentini et al., 1996; Gera et al., 1998) and in the Terra Nova Bay area (Argentini and Mastrantonio, 1994). A climatological perspective has been provided by Zhang et al. (2011) and Nygård et al. (2013) who investigated the frequent temperature and specific humidity surface-based inversions over Antarctica using radiosonde data from the Integrated Global Radiosonde Archive (IGRA). In particular, Nygård et al. (2013) show that over coastal regions, roughly half of the humidity inversions is associated to temperature inversions while the other half is due to an horizontal advection of vapor increasing with height. Nevertheless the spatial and temporal variabilities of the low-tropospheric temperature, humidity and wind profiles and their representation by state-of-the-art climate models and atmospheric reanalyses have not been studied hitherto.

The aim of the present paper is twofold: to characterize the vertical structure of the low atmosphere over several locations of coastal East-Antarctica and to present a first multi-station evaluation of model simulations and meteorological reanalyses in this region. More specifically, the main objectives are to:

1. Document and decipher the fine vertical structure of temperature, humidity and wind in the low troposphere of coastal East-Antarctica using radiosonde data
2. Evaluate the ability of the ERA-Interim and ERA5 reanalysis products and of the Polar WRF regional model to reproduce the observed mean structure and its variability.

The paper is structured as follows: Section 2 introduces the data sets and details the methodology. Section 3 presents the results and the latter are further discussed in Section 4. Section 5 closes the paper with a conclusion.



## 2 Data and methods

### 2.1 Radiosonde data at nine Antarctic stations

The low troposphere over coastal East-Antarctica has been sampled for a few decades by daily radiosoundings at several stations<sup>1</sup>. In this study we analyse daily radiosonde data at seven permanent Antarctic stations - Mc Murdo, Mawson, Davis, Casey, DDU, Neumayer and Halley - and at two summer stations - Mario Zucchelli and Princess Elizabeth stations (hereafter MZ and PE stations respectively) - over the 8-year period 2010-2017. The specific location of all the stations is indicated in Fig. 1. The landscapes surrounding the different stations show a great morphological diversity.

Mc Murdo station lies on the southwestern edge of the Ross island, close to the interface between the Ross ice shelf - that extends over 900 km to the south with a slight rise in elevation - and the Ross sea to the north. The topography of the Ross island region is complex with steeply rising terrain associated to the two main mounts: the Mount Erebus and the Mount Terror. Black island and White island with respective elevation of 1000 m and 750 m are located 30 km south of Mc Murdo. The Transantarctic Mountains with elevations greater than 2000 m are located west of Ross island at a distance of  $\approx 80$  km.

About 350 km north of Mc Murdo, MZ is located on the coast of Terra Nova Bay, at the northeastern side of the confluence zone of the Prietsley and Reeves glaciers and at the south of an orographic jump of more than 1200 m associated to the abrupt slopes of the Transantarctic Mountains Range.

Mawson station is situated on the coast of an isolated horseshoe-shaped rocky area enclosing a small harbour. The ice sheet surface steeply rises from the coastal ice cliffs surrounding the station toward the Plateau.

Davis lies to the east of the Amery ice shelf in the Vestfold Hills, the largest coastal ice-free area of Antarctica. The land rises progressively to the south-west towards the Plateau and a ridgeline in the ice topography is located around 60 km to the northeast of Davis (Alexander and Murphy, 2015).

Casey station is located on the coast of the Wilkes Land, at 12 m of altitude. The Law Dome, which lies to the east of Casey and which rises to an altitude of 1395 m, shields the base from the easterly winds that predominate in the region.

DDU station is located at 41 m of altitude on Petrel Island, approximately 5 km off Adélie Land and the ice sheet proper. Neumayer station lies on the Ekström ice shelf, at a few kilometers from the shore line. The shelf extends more than 100 km to the south with an inclination of  $\approx 1$  ‰.

Halley station is situated towards the seaward edge of the Brunt Ice shelf, Coats Land, on the southeastern shore of the Weddell Sea at about 30 m of altitude. The Brunt ice shelf extends to the south-east of the station for over 40 km, and the uniform surface rises very gradually over this distance until the hinge zone where the land steeply rises up to the continental plateau.

Unlike all the other stations of interest here - that are located close to the coast and near sea-level - PE is 220 km far from the coast at 1382 m of altitude. The station has been built in the Dronning Maud Land just north of the Sør Rondane Mountains on a small granite ridge and it is located at approximately 1 km north of the Utsteinen Nunatak that culminates at an elevation of 1564 m.

<sup>1</sup> see <http://amrc.ssec.wisc.edu> for a complete list of Antarctic stations with a continuous radiosounding program.



Although fairly short for a climatological study, the 2010-2017 analysis period was chosen because it fits the period for which ERA5 reanalysis was available at the time of carrying out the analysis (see Sect. 2.2), and because it corresponds to the period for which the model of radiosonde for most stations are Vaisala RS-92. The RS-92 sonde is currently the most used sonde type over the globe and it is considered as the reference radiosonde by the Global Climate Observing System Reference Upper-Air Network. This model has also been shown to be slightly affected by common dry biases in cold and dry environments (Milosevich et al., 2004) particularly owing to its two humidity sensors heated alternately (Tomasi et al., 2006; Ingleby, 2017). Note that at DDU and PE stations, the types of radiosonde are Modem M2K2-DC and Graw DFM-09 respectively. Bock et al. (2013) evidenced a low bias in relative humidity between 2 and 10 % in Modem M2K2-DC measurements compared to those obtained with RS-92 at the Observatoire de Haute Provence, southern France. Since 2013, a correction algorithm on moisture measurements from DDU has therefore been applied but this has limited impacts on the statistics shown in the present paper. Technical information on all the radiosonde types can be found at [www.graw.de](http://www.graw.de), [www.vaisala.com](http://www.vaisala.com) and [www.meteomodem.com](http://www.meteomodem.com). The specifics of the radiosoundings at each station including the sounding times are summarized in Tab. 1. As the aim of this study is to characterize the fine vertical structure of the low troposphere, we could not make use of data from IGRA which are subsets restricted to the so-called ‘mandatory’ pressure levels completed by a few additional levels with significant deviation from linearity of temperature and dew-point between mandatory levels (so-called ‘significant levels’). We rather use here data sets provided by local meteorological organisations or polar institutes and that have a higher vertical resolution. The sole treatment made on the raw data is a 15 s -  $\approx 75$  m - smoothing (applied twice) of the wind data, 15 s being the averaged period of oscillation of the sonde in the first 3000 m above the surface. This allows to remove the oscillations in the data due to the natural pendulum motion of the payload after launching. Temperature, humidity and wind measurements in the first 100 m are also excluded from the data sets for two main reasons. First, the analysis of temperature and humidity data potentially affected by thermal lag error - if the radiosonde was not perfectly equilibrated outdoor before launching for instance - is avoided. Second, below an altitude of 100 m the balloon may have not reached the flow velocity yet and may thus be still in a transitory state. Yurchak (2013) shows that for a typical balloon with an ambient wind speed of  $20 \text{ m s}^{-1}$  (resp.  $5 \text{ m s}^{-1}$ ), the adaptation time scale is approximately 5 s (resp. 20 s) corresponding to an altitude of 25 m (resp. 100 m).

## 2.2 ECMWF reanalysis products

Two reanalysis data sets from the European Center for Medium Range Forecast (ECMWF) will be confronted to radiosonde data over the period 01/01/2010-31/12/2017. Firstly, the ERA-Interim (ERA-I, Dee et al., 2011) reanalysis is a third generation reanalysis product with an averaged horizontal resolution of 79 km and 60 vertical levels up to 0.1 hPa among which 17 are in the first 3000 m a.g.l. The reanalysis is based on simulations with the IFS model Cycle 31r2 using a 4DVAR assimilation. Comparing second and third generation reanalysis products with Antarctic station observations, Bracegirdle and Marshall (2012) show that ERA-I is the most reliable for mean sea level pressure and 500 hPa geopotential height values and trends. ERA-I analyses are available at four times per day: 00, 06, 12 and 18 UTC. Secondly, we will use the last generation reanalysis product from the ECMWF: ERA5. Major improvements from ERA-I include a better spatial resolution (31 km on average on the horizontal, 137 vertical levels up to 0.01 hPa among which 33 are in the first

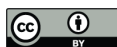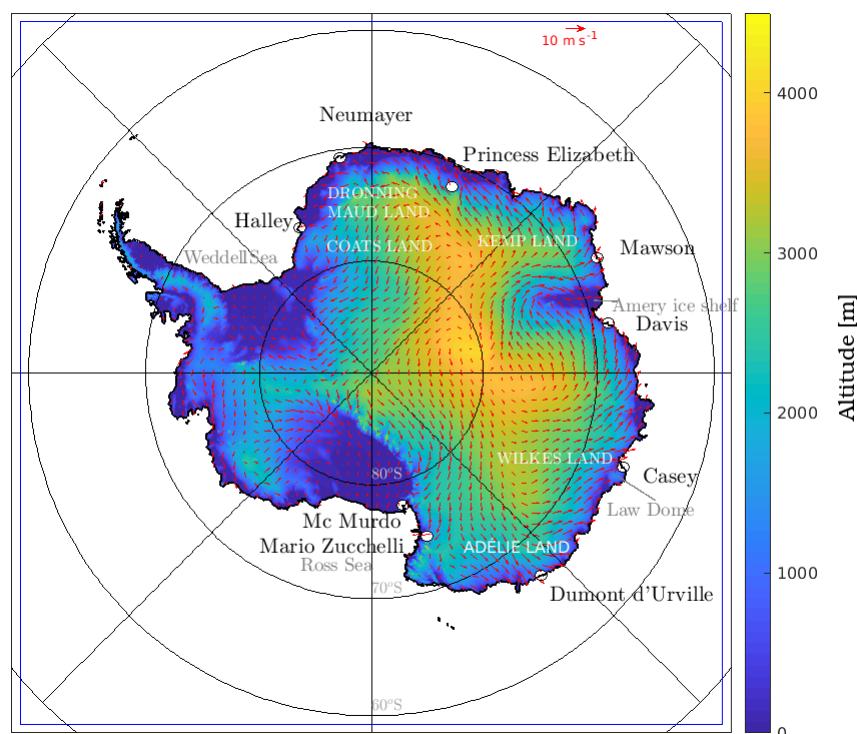

**Figure 1.** Topography of the Antarctic continent from the Bedmap2 dataset at 10 km resolution (Fretwell et al., 2013). Black dots indicate stations from which radiosonde data are used in this study. The blue line delimits the Polar-WRF simulation domain. Red arrows show the 2010-2017 mean wind vector from ERA5 reanalyses.

3000 m a.g.l.), a more elaborated model physics (IFS Cycle 41r2), more consistent sea surface temperature, sea-ice cover and additional model inputs from observations. A summary of the changes between ERA-I and ERA5 can be found at <https://confluence.ecmwf.int/pages/viewpage.action?pageId=74764925> and the physics of the IFS model used for ERA5 is described in the technical notes on the ECMWF website (<https://www.ecmwf.int>). ERA5 analyses are available at a one-hour

5 granularity.

It is worth to mention that radiosonde data at all the considered Antarctic sites - except PE - have been assimilated by the IFS model to make both ERA-I and ERA5. The reanalysis data sets are therefore not purely independent from radiosonde data. Nevertheless only the meteorological fields at mandatory and significant levels are assimilated. Hence, the fine scale vertical structure of the boundary-layer in ERA-I and ERA5 is expected to remain strongly dependent on the model configuration.

## 2.3 Polar WRF simulations

Numerical simulations were carried out with the regional model Polar WRF v3.9.1 (e. g. Bromwich et al., 2013). The simulation domain size is 5810 km × 5810 km (see blue square in Fig. 1). It is centered over the South-Pole and encompasses the





**Table 1.** Characteristics of radiosonde data used in this study. ‘DDU’ refers to Dumont d’Urville, ‘MZ’ to Mario Zucchelli and ‘PE’ to Princess Elizabeth station. The indicated time corresponds to the official observation time. Note that sondes are usually launched 45 min or one hour before. For each station the percentage of data indicates the percentage of available radiosoundings in the corresponding period. When two numbers are indicated, the first (resp. second) one corresponds to the percentage of sounding at 00 UTC (resp. 12 UTC). In Casey and Mawson data sets, measurements are not provided at constant time or vertical resolution. Subsequently, the averaged number of vertical levels in the first 3000 m a.g.l. is indicated in the “resolution” column.

| station name | sonde type    | period                                         | vertical resolution   | % of data  | UTC Time<br>(Local Time) |
|--------------|---------------|------------------------------------------------|-----------------------|------------|--------------------------|
| Halley       | Vaisala RS-92 | 01/01/2010-12/02/2017                          | 2 s ( $\approx$ 10 m) | 90.8       | 12 (12)                  |
| DDU          | Modem M2K2-DC | 01/01/2010-31/12/2017                          | 1 s ( $\approx$ 5 m)  | 90.8       | 00 (10)                  |
| McMurdo      | Vaisala RS-92 | 01/01/2010-31/12/2017                          | 2 s ( $\approx$ 10 m) | 85.0, 50.5 | 00 (12), 12 (00)         |
| Neumayer     | Vaisala RS-92 | 01/01/2010-31/12/2017                          | 5 s ( $\approx$ 25 m) | 95.6       | 12 (13)                  |
| Mawson       | Vaisala RS-92 | 01/01/2010-31/12/2017                          | 23 levels in 3000 m   | 95.2       | 12 (16)                  |
| Casey        | Vaisala RS-92 | 01/01/2010-31/12/2017                          | 23 levels in 3000 m   | 89.3, 86.9 | 00 (11), 12 (23)         |
| Davis        | Vaisala RS-92 | 01/01/2010-31/12/2017                          | 2 s ( $\approx$ 10 m) | 84.2, 75.6 | 00 (07), 12 (19)         |
| MZ           | Vaisala RS-92 | Dec. Jan. Feb. 2010-2016                       | 2 s ( $\approx$ 10 m) | 67.2, 75.3 | 00 (11), 12 (23)         |
| PE           | Graw DFM-09   | Dec. 2014, 2015, 2017 and Jan. Feb. 2015, 2016 | 5 s ( $\approx$ 25 m) | 51.9       | 12 (17)                  |

whole Antarctic continent. Simulations are run at 35 km horizontal resolution over the period 2010-2017 (with a one-week spin-up). Initial conditions, lateral boundary forcings as well as sea-ice cover and sea surface temperature are provided by the ERA5 reanalysis data set. As recommended in Deb et al. (2016), we use the Bedmap2 topography from Fretwell et al. (2013). The model is run with 66 vertical levels among which 23 are located in the first 3000 m above the ground surface.

- 5 As in the standard configuration of the Antarctic Mesoscale Prediction System (AMPS, <http://www2.mmm.ucar.edu/rt/amps>), the shortwave and longwave radiation schemes are the RRTMG scheme updated every 15 min and the cumulus scheme is the Kain-Fritsch scheme. We use the two-moment microphysics scheme of Morrison et al. (2009) that leads to the best Polar WRF simulations compared to cloud and radiation measurements over the Antarctic Peninsula (Listowski and Lachlan-Cope, 2017). For the turbulent diffusion in the boundary layer we use the 2.5 level Mellor-Yamada-Nakanishi-Niino (MYNN) turbulent kinetic energy (TKE) scheme (Nakanishi and Niino, 2006) coupled with the MYNN surface layer scheme, as in Bromwich et al. (2013). Notwithstanding that MYNN is an advanced version of the Mellor-Yamada-Janjic (MYJ) scheme - with improved formulation of mixing length and ~~including the effect of water condensation~~ - Deb et al. (2016) noticed better WRF performances in terms of surface temperature over West Antarctica using the original MYJ parametrisation. To assess the sensitivity to the turbulence scheme and the vertical resolution, we have also carried out a simulation with the MYJ scheme coupled with the Eta-similarity surface layer scheme and one simulation with a refined vertical resolution close to the surface (see Sect. 4.3).



## 2.4 Analysis methods

5 Our analysis will focus on the low troposphere that we delimit as the layer between 0 and 3000 m a.g.l.. This atmospheric layer was chosen because it includes the boundary layer at all stations and because it is slightly deeper than the mean depth of the poleward mass flux layer (Van Lipzig and Van Den Broeke, 2002). Note also that  $z=3000$  m a.g.l. corresponds to the altitude from which the zonal mean circulation over coastal Antarctica reverses (from anticyclonic to cyclonic, c.f. Van Lipzig and Van Den Broeke, 2002).

10

We will compare radiosoundings at each Antarctic station with the simulated and reanalysed profiles at the nearest model grid point. Otherwise mentioned, reanalysis and model profiles will be compared to radiosonde data at each station at the same time as sonde launchings i.e at 00 UTC and/or 12 UTC depending on the station (see Tab. 1). It should be noted that the statistical evaluation in Sect. 3.2 is not appreciably sensitive to a  $\pm 1$  hour shift in the time sampling of reanalyses and Polar WRF data sets.

15

Three atmospheric variables will be analysed: the wind (speed and direction), the temperature and the relative humidity calculated with respect to ice as temperature are most of the time below freezing at all stations. We will mostly focus on the relative humidity and less on the specific humidity (or mixing ratio) for three reasons. First, specific humidity is a variable that spans several order of magnitude during the year due to its strong dependency upon temperature making the annual statistics dominated by high summer values. The second reason is that the critical variable for cloud and precipitation formation and subsequently for the surface energy and mass balance is the relative humidity. Last, the low-level sublimation process - which is a crucial process over coastal East-Antarctica - mostly manifests in the relative humidity profiles. Information about the specific humidity profiles will be nonetheless given in the supplementary materials.

20

In addition to yearly and seasonal statistics, we will consider for each station a "precipitation events" ensemble which gathers all profiles for which substantial precipitation is reaching the ground surface (precipitation rate is greater than  $0.1 \text{ mm h}^{-1}$ ). For radiosounding profiles, the precipitation conditioning is made using ERA-5 reanalyses.

25

The statistics of wind, humidity and temperature profiles in reanalyses and Polar-WRF have been evaluated by comparing the median profiles as well as the 80-20th and 95-5th interquantiles at every model or reanalyses level height. The ERAI and ERA5 performances at the sounding time have also been evaluated using mean bias and root mean square error calculations at their respective vertical level heights. The variability in wind direction has also been evaluated using the directional constancy parameter DC, defined as:

30

$$DC = \frac{(\overline{u^2} + \overline{v^2})^{1/2}}{\overline{u^2 + v^2}^{1/2}} \quad (1)$$

where  $u$  and  $v$  are the zonal and meridional components of the wind respectively and the overbar indicates the time average.





### 3 Results

- 5 In this section, we present the main features of the vertical structure of the low troposphere over coastal East-Antarctica using radiosonde data and we assess the ability of reanalyses and Polar-WRF in reproducing the profiles statistics.

#### 3.1 General features of the vertical structure of the low troposphere from radiosonde data at nine Antarctic coastal stations

##### 3.1.1 Annual statistics

- 10 A broad view of the yearly vertical structure of the wind speed (U), temperature (T), and relative humidity with respect to ice (RH<sub>i</sub>) in the low-troposphere from radiosonde data at each station is depicted in Fig. 2. ~~It is worth to remind~~ that only summer data can be shown for MZ and PE stations. One particularly striking feature in Fig. 2 is the diversity of profiles around the coast of East-Antarctica. In the Ross sea sector (Mc Murdo and MZ stations), one can notice the low and nearly constant wind speed. As shown in Seefeldt et al. (2003) and Monaghan et al. (2005), the atmospheric flow at Mc Murdo is strongly influenced
- 15 by orographic effects like the blocking of the dominant katabatic southerly flow by the Ross Island. Moving westward (from left to right in the Fig. 2) to Adélie Land and DDU station, a clear katabatic layer can be pointed out in the profiles. This layer is characterized by high wind speeds (with an annual median around 10 m s<sup>-1</sup>) and capped by a temperature inversion. Still more to the west, Casey station generally experiences light outflow from the northeast, off Law Dome (Adams, 2005). This is visible in radiosonde data with a median wind speed between 4 and 10 m s<sup>-1</sup> monotonically increasing with increasing height.
- 20 Note the relatively high value of the 90th percentile in the first 500 m a.g.l.. This observation recalls the results of Turner et al. (2001) that explained one extraordinarily very strong wind event (10 m speed exceeded 50 m s<sup>-1</sup>) at Casey associated to a deep low north of the coast in concert with a high surface pressure inland. At Davis station, the yearly median wind profile reveals a deep katabatic layer with a moderate median wind speed maximum of 7 m s<sup>-1</sup> at approximately 800 m of altitude. At Mawson station, Fig. 2 shows that both the median wind speed and the variability is maximum close to the surface. This
- 25 observation echoes the conclusions of Dare and Budd (2001) stating that the near-surface wind at Mawson is driven by shallow surface drainage flows - thereby explaining the low level maximum - and modulated by the vertical transfer of momentum from the midtroposphere that largely depends on the synoptic pressure gradient which can strengthen or weaken the surface drainage flow. Temperature surface-based inversions are a common climatological feature of the Antarctic troposphere. Interestingly for all the stations considered, no surface-based inversion can be pointed out in the yearly median profiles from radiosoundings.
- 30 However, surface-based temperature inversions are present in the first 100 m above the surface in ERA-I, ERA5 and Polar-WRF (see Sect. 3.2). As the first 100 m of radiosonde data are not analysed here owing to the low reliability of radiosonde data in this layer, this may explain the absence of inversion in the yearly median temperature profiles at Mc Murdo, DDU, Casey, Davis and Mawson stations.

At DDU, Casey, Davis, and Mawson stations, one can further point out that the yearly median RH<sub>i</sub> profiles show lower values in the first kilometer above the ground surface. This bottom layer of drier air corresponds to the advection of absolutely dry air masses by katabatic winds that adiabatically warm during their descent from the interior of the continent. At DDU,



this process is sufficiently strong to exhibit a clear signature in the yearly statistical profiles of specific humidity (Fig 1 in supplementary materials). Moving westward and inland towards PE station, radiosonde data reveal nearly constant median profiles of wind speed and RH<sub>i</sub> in summer. Pattyn et al. (2010) underline that the PE station site is sheltered by the Sør Roundane mountain range at the south and it is thus protected from strong katabatic jets. Albeit deflected, the flow originating from the Plateau shows a high directional constancy ( $> 0.8$ ) over a depth exceeding 2000 m (see Sect.3.2). While the median temperature linearly decreases with increasing height, the 80th and 90th percentile of temperature show constant and slightly increasing values close to the surface respectively, evidencing the occurrence of surface-based inversions in summer during calm wind conditions (not shown). Neumayer and Halley stations are both located on an ice shelf and the respective vertical structures of the low troposphere are reasonably similar. King (1989) shows that the low-level flow at Halley is forced by both synoptic scale pressure gradients and the pressure gradient due to the stable air over the gently sloping surface of the Brunt ice shelf. Kottmeier (1986) draw similar conclusions for Neumayer station over the Ekström ice shelf, emphasizing the role of baroclinicity ~~viz~~ the thermal wind effect in shaping the wind structure. Fig. 2 shows that the median wind speed at both stations exhibits a shallow maximum close to the surface. The wind speeds show a large intra-annual variability and they are slightly stronger at Neumayer than at Halley, with medians at  $z = 200$  m close to  $11 \text{ m s}^{-1}$  and  $8 \text{ m s}^{-1}$  respectively. RH<sub>i</sub> is nearly constant or slightly decreasing with increasing height. Unlike stations in coastal katabatic regions, the median temperature profiles reveal a surface-based inversion in the first kilometer above the ground.

### 3.1.2 Seasonal statistics

A comparison of the wind, temperature and relative humidity profiles between the two extreme seasons - summer (December-January-February, DJF) and winter (June-July-August, JJA) - is depicted in Fig. 3. We consider here two stations at which the typical flow is katabatic - DDU and Mawson - one station over an ice shelf - Halley - and the Mc Murdo station where the vertical structure of the troposphere is particular owing to the complexe terrain at the foot of the Transantarctic mountains. One can point out stronger wind speed at low-levels in winter than in summer at Mawson and Halley stations, consistent with more stable boundary layers on the Plateau and subsequent stronger katabatic winds as well as stronger large scale pressure gradients (Van den Broeke and Van Lipzig, 2003). Such increase is not visible at DDU station neither in the median nor in the percentiles. The absence of strong seasonality in the low-level wind speed at DDU is in agreement with surface observations in König-Langlo et al. (1998) while measurements at meteorological stations a few tens of kilometer further inland reveal significantly stronger wind speed in winter than in summer (e.g., Vignon et al. (2018)). This suggests that a slowing down mechanism at the coast that should be particularly active in winter - like the pressure gradient force associated to the piling-up of cold air over sea-ice - may damp the seasonal cycle. At Halley, Mawson and DDU stations, the wind direction at  $z=500$  m is almost constant throughout the year, reflecting the strong orographic influence in shaping the low-level flow at these three locations. It is also worth noting that unlike in summer, the JJA median profile of wind speed at DDU, Mawson and Halley show a significant increase with increasing height above 2000 m. This may be explained by the location of the edge of the polar vortex - which is stronger in winter - that lies closer to edge of the continent in winter and that can be responsible to a significant vertical gradient of the wind speed even in the mid-troposphere (König-Langlo et al., 1998).

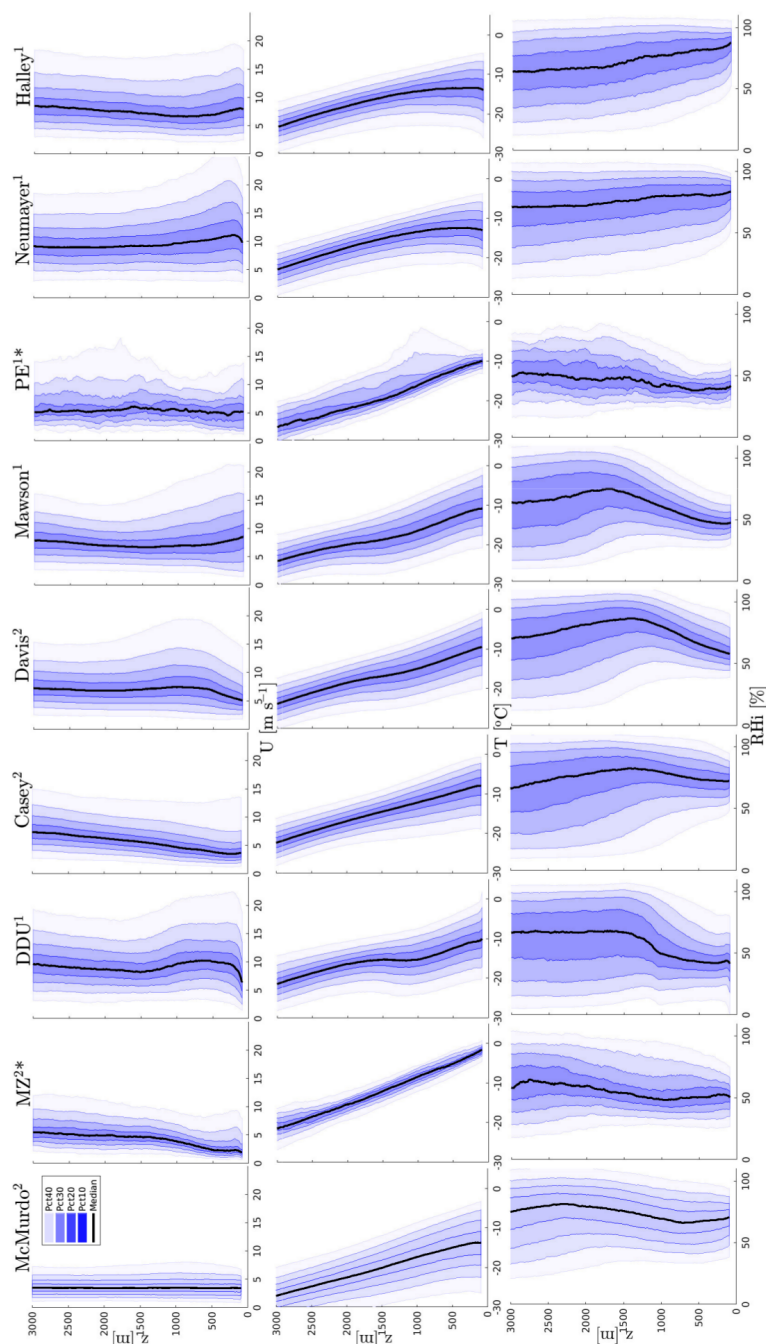

**Figure 2.** Vertical profiles of the annual wind speed (top row), temperature (middle row) and relative humidity with respect to ice (bottom row) from radiosonde measurements at nine Antarctic stations. Black lines are the medians, colored lines refer to the 10th, 20th, 30th, 40th, 60th, 70th, 80th and 90th percentiles. In the legend, 'Pct $x$ ' refers to the shaded area that covers  $x$  percents of the data greater than the median and  $x$  percents of the data lower than it. The altitude  $z$  is above ground level. Numbers in exponent near station names in title indicate the number of radiosounding per day at the corresponding station. '\*' symbol labels the two stations for which only data from December to February are shown.



At Mc Murdo station, the wind speed is slightly stronger in winter and it is vertically homogeneous over the first 3000 m in both DJF and JJA seasons. Temperatures at the four stations are naturally warmer in summer than in winter but the capping inversion at DDU and Mawson above the katabatic layer is more pronounced in JJA. Likewise, the surface-based temperature inversion over Halley is not present in summer. Note that owing to the diurnal cycle of the insolation during the summer season, summer vertical profiles may depend on the local time of the sounding and may not be considered as climatologically representative. The temporal representativity of radiosoundings will be further discussed in Sect.4.1. The relative humidity profile at Mc Murdo shows a clear seasonality, with a more humid air (relatively) above 2000 m in summer. This is consistent with the summer wind rose at  $z=2000$  m with more frequent flow from the east compared to the winter season. Easterly winds at Mc Murdo generally correspond to the advection of air masses that transit over the Ross ice shelf or Ross sea and that do not directly come from the dry atmosphere over the ice sheet. The relatively dry katabatic layer at DDU and Mawson stations is well visible in the summer and winter RHi profiles, with an especially pronounced "dry concavity" in winter at DDU. Interestingly, the winter median profile of RHi at DDU station slightly increases with decreasing height in the first hundreds of meters above the surface. Stronger water turbulent fluxes at the surface in winter are hardly probable since there is no open ocean close to the station in winter while it is often the case in summer. This local maxima in the profiles may thus be attributed to the presence of blowing snow in the near-surface flow, which is more frequent in winter due to stronger katabatic winds on the ice sheet and to a better snow surface erodibility (Amory et al., 2017).

### 3.1.3 Statistics during precipitation events

Grazioli et al. (2017b) have stressed the role of katabatic winds in sublimating a significant part of the precipitation falling on the margins of the ice sheet. In this section we examine the vertical structure of the wind and relative humidity during precipitation events at the six stations with the most intense winds. In agreement with Grazioli et al. (2017b), the second row of Fig. 4 shows that even during precipitation events, the atmosphere is unsaturated close to the surface at DDU, Casey, Davis and Mawson. First row of Fig. 4 also shows that the wind is generally enhanced during precipitation events at the latter four stations (in comparison with the climatology in Fig. 2). Moreover, wind roses at  $z=500$  m in the bottom row of Fig. 4 show that the flow at this altitude is mostly southeasterly, northeasterly, easterly and northeasterly at DDU, Casey, Mawson and Davis respectively. This means that the low-level flow remains of continental origin during most of the precipitation events (see map in Fig. 1). The strengthening of the continental low-level flow at the Antarctic coast during precipitation events is consistent with the general picture of moisture advection by synoptic cyclones documented in Naithani et al. (2003b, a). As a synoptic weather system transits eastward off the Antarctic coast and approaches a station, it advects oceanic air with clouds towards the continent at its eastern flank. Note that the largest amount of moisture and precipitation are brought by large frontal systems not necessarily associated to very intense cyclones but to low-pressure systems with a large radius Uotila et al. (2011). Meanwhile, the surface pressure over the ocean decreases, the downslope pressure difference increases and subsequently the near-surface wind flow from the continent increases. Strong near-surface winds and low relative humidity are thus very favorable conditions for the occurrence of the mechanism of low-level sublimation of precipitation (LSP, Grazioli et al., 2017a) at DDU, Mawson, Davis and Casey stations. Note that even during precipitation events, the relative humidity can be as low as 25 % (resp. 26%) above

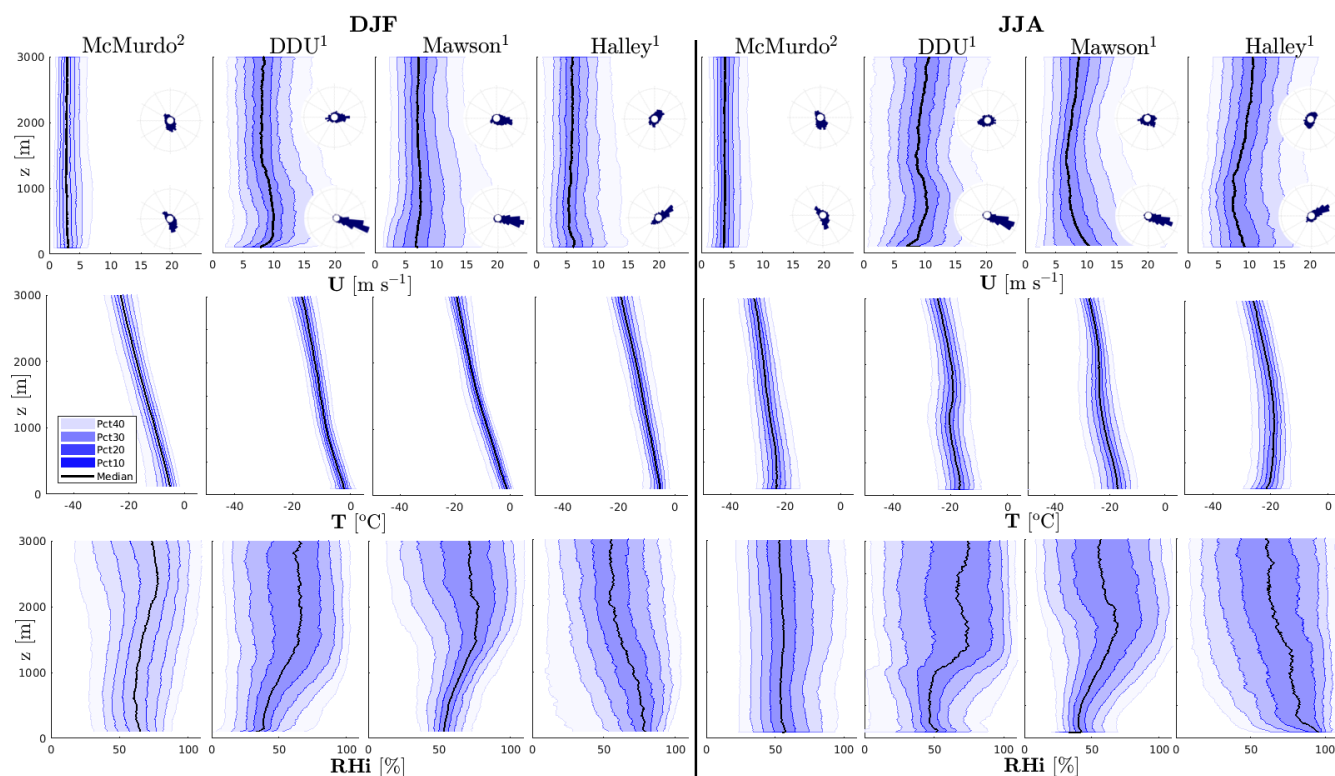

**Figure 3.** DJF (left panels) and JJA (right panels) vertical profiles of the of the wind speed (top row), temperature (middle row) and relative humidity with respect to ice (bottom row) from radiosonde measurements at four Antarctic stations. Black lines are the medians, colored shadings refer to the 10th, 20th, 30th, 40th, 60th, 70th, 80th and 90th percentiles. In the legend, 'Pct $x$ ' refers to the shaded area that covers  $x$  percents of the data greater than the median and  $x$  percents of the data lower than it. The altitude  $z$  is above ground level. Wind roses at  $z=500$  m and at  $z=2000$  m are also plotted in the top row panels. Numbers in exponent near station names in title indicate the number of radiosounding per day at the corresponding station.

$z=2000$  m (resp. below  $z=500$  m) at DDU station. These situations often correspond to precipitation from clouds - associated  
 5 to northerly warm advections - above 3000 m and moving above a remaining deep layer of continental flow from the interior  
 of the ice sheet. One could rightly question the precipitation conditioning by ERA5 data which may lead to the inclusion of  
 spurious profiles (i.e. not corresponding to actual precipitation) in the "precipitation" subset. However, Durán-Alarcón et al.  
 (2018) also show low values of RH<sub>i</sub> in the first 3000 m a.g.l. at DDU when conditioning the radiosonde profiles to precipita-  
 tion and virga events from in-situ radar data, conforing us in the actual concomitant occurrences of precipitation and of low  
 10 near-surface relative humidity at DDU.

Fig. 4 shows that despite enhanced wind speed at Neumayer and Halley stations, the first 3000 m of atmosphere are com-  
 pletely saturated during precipitation events reflecting the likely absence of the LSP mechanism at these stations. For instance,

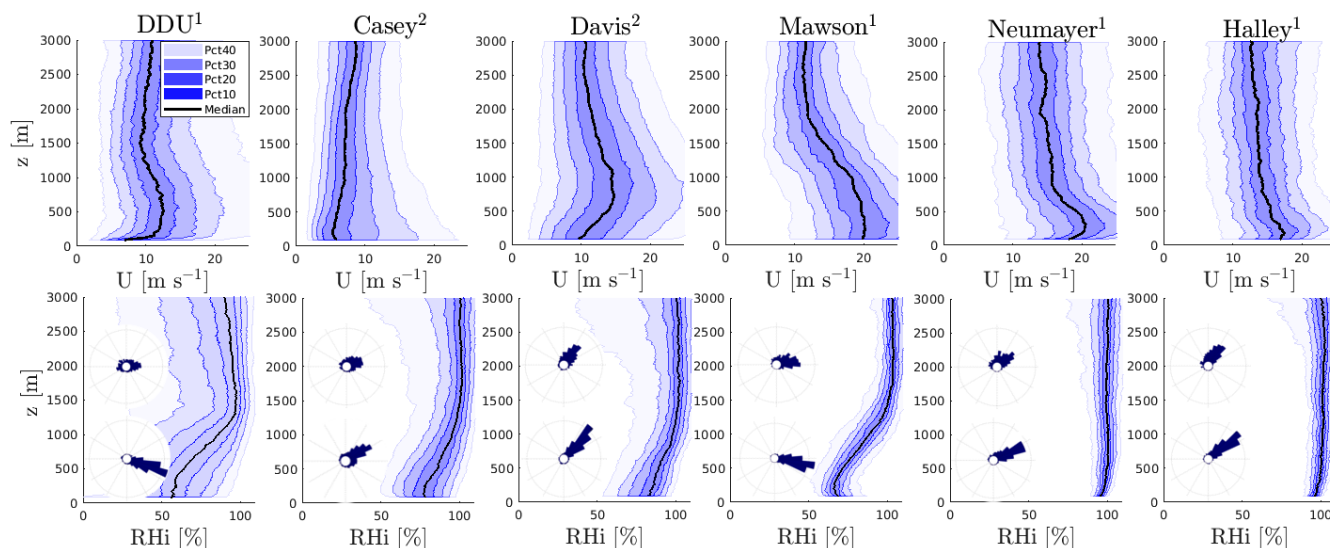

**Figure 4.** Vertical profiles of the wind speed (top row) and relative humidity with respect to ice (bottom row) from radiosonde measurements at five Antarctic stations along the eastern Antarctic coast. Data sets are restricted to precipitation cases. Black lines are the medians, colored lines refer to the 10th, 20th, 30th, 40th, 60th, 70th, 80th and 90th percentiles. In the legend, 'Pct $x$ ' refers to the shaded area that covers  $x$  percents of the data greater than the median and  $x$  percents of the data lower than it. The altitude  $z$  is above ground level. Wind roses (conditioned to precipitation events) at  $z=500$  m and  $z=2000$  m are plotted in the lower row panels. Numbers in exponent near station names indicate the number of radiosoundings per day at the corresponding station.

the wind rose at  $z=500$  m at Halley shows that the wind at this station during precipitation events is northeasterly, indicating a flow from the coastal edge of the Brunt ice shelf and not from the interior of the ice sheet. This observation sheds light on the geographical discrepancies of the LSP around the coast of East-Antarctica.

### 3.2 Evaluation of the vertical profile statistics in ERA-I, ERA5 and Polar WRF

In this section, we assess the ability of ERA-I, ERA5 and Polar WRF to accurately reproduce the vertical structure of the low-troposphere at the nine Antarctic stations. It is worth to remind that unlike Polar WRF, ERA-I and ERA5 are not fully independent from radiosoundings since they assimilate them at low vertical resolution (except at PE station). Note also that for complementing the figures presented in this section, the reader can refer to figures similar to Fig 2 for the ERA-I, ERA5 and Polar WRF data sets as well as a figure showing median and interquantile differences for all stations and all variables in the supplementary materials (Fig. 2, 3, 4 and 5).

#### 3.2.1 Wind

Fig. 5 shows the differences of yearly median, yearly 80-20th interquantile and yearly 95-5th interquantile of wind speed with respect to radiosonde data at the nine stations. This figure can be analysed in parallel with Fig. 6 that compares the directional





constancy at  $z=500$  m (dotted axes) and  $z=2000$  m (solid axes) in the different data sets. Above 2000 m a.g.l. the median and interquantile absolute differences of the wind speed are generally less than  $3 \text{ m s}^{-1}$  in ERA-I and ERA5. The mid-troposphere circulation and its variability are thus reasonably well reproduced over the coastal East-Antarctic margins in the reanalyses. Polar-WRF often shows slightly higher values of the interquantile differences and it significantly overestimates the directional constancy at  $z=2000$  m at all stations, and especially in the Ross sector (Mc Murdo and MZ stations, c.f. Fig. 6). This too directionally constant flow combined with an overestimation of the variability of the wind speed at Mc Murdo (panel a in Fig. 7) particularly questions the ability of a model running at 35 km resolution to represent the local flow, even at  $z=2000$  m, in Antarctic regions with complex orography. This also suggests that in reanalyses with similar or coarser horizontal resolution, the data assimilation may play a substantial role in reproducing the wind statistics at Mc Murdo and MZ stations. In katabatic regions, Polar-WRF and reanalyses represent reasonably well the sharp increase in directional constancy from  $z=2000$  m to  $z=500$  m that shows the contrast between the synoptic and the katabatic flows. However significant deficiencies can be noted for the low-level wind speed, especially at DDU, Casey and Davis stations. At these three stations the median and the interquantiles are overestimated in the three data sets. Smallest differences are generally observed for ERA5, even though large values of the 95-5 interquantile differences are noticeable for instance at Casey where it exceeds  $5 \text{ m s}^{-1}$  at  $z=500$  m in the two ERA reanalyses. The largest differences are noticeable for Polar-WRF, especially near the ground surface. These differences actually reflects a too shallow and too strong katabatic jet. Albeit observed in both summer and winter seasons, the near-surface wind speed overestimation is more pronounced in winter at the three stations and it only occurs in winter at Mawson station (see Tab. 2). Sect. 4.3 will investigate the possible underlying causes of this strong katabatic wind deficiencies in Polar-WRF. At Neumayer and Halley stations, the statistics of the wind structure are well reproduced by the ERA5 reanalysis while ERA-I underestimates the variability in the first 500 m above the surface with interquantile differences around  $-4 \text{ m s}^{-1}$ . Polar-WRF shows correct statistics at Neumayer but it overestimates the interquantiles as well as the directional constancy at Halley at both  $z=500$  m and  $z=2000$  m (Fig. 6). This reveals an underestimation of the synoptic variability in the Halley region in the model, and particularly an underestimation of large scale south-westerly flows from the Weddell sea (not shown). At PE station, the summer distribution of the wind speed in reanalyses and Polar-WRF significantly differ from the one from radiosonde data. At  $z=1000$  m, the median difference is close to  $8 \text{ m s}^{-1}$  for the three data sets and Polar-WRF shows a much stronger median wind speeds overestimated by  $4\text{--}8 \text{ m s}^{-1}$  up to 3000 m. ERA-I shows a very excessive median wind speed in the first 1000 m while in ERA5, the wind speed and variability are strongly overestimated between  $z=300$  m and  $z=1500$  m. As PE is the sole station from which radiosonde data are not assimilated, these strong biases question the ability of the free IFS model at the considered horizontal resolution in reproducing the dynamics of Antarctic boundary layer, at least in the PE region where the air flow is strongly affected by the topography of the Sør Rondane Mountains.

### 3.2.2 Temperature

Fig. 7 is similar to Fig. 5 but for temperature profiles at four stations with very different yearly temperature statistics (see Fig. 2). At Davis, not only the median but also the variability is well reproduced by ERA-I, ERA5 and Polar WRF. This result can be extended to the stations in katabatic regions: Mawson, DDU and Casey. A cold median bias between 2 and 4

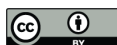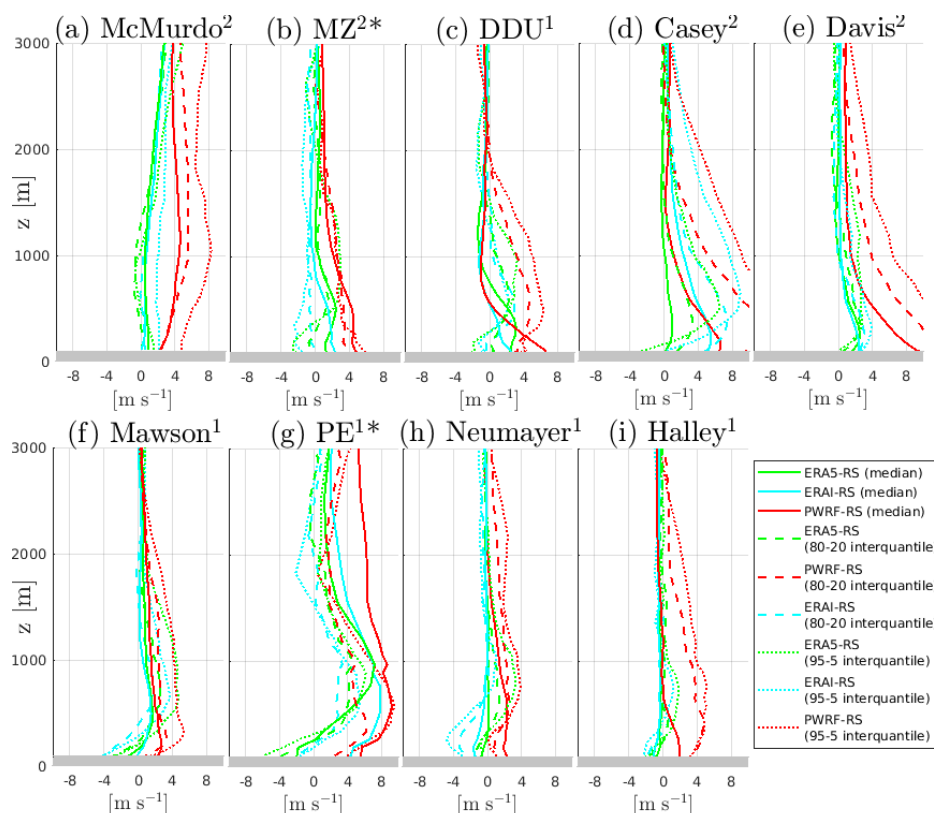

**Figure 5.** Yearly median differences (solid lines), 80-20th interquantile difference (dashed lines) and 95-5th interquantile difference (dotted lines) with respect to radiosoundings for wind speed at nine Antarctic stations. Red, green and cyan lines refer to Polar WRF, ERA5 and ERA-I respectively. Grey strips delimit the first 100 m above the ground surface. Polar WRF and ERA reanalyses are conditioned to radiosounding times. Numbers in exponent near station names in title indicate the number of radiosounding per day at the corresponding station. '\*' symbol labels the two stations for which only data from December to February are shown.

°C can however be noticed at Mawson in ERA-I (see Fig. 5 in supplementary materials) which can be partly explained by more inland location of the nearest ERA-I grid point. At Halley station, ERA-I and ERA5 profiles are very close to those from radiosonde data. Polar WRF also shows realistic median profiles, but it overestimates the interquantiles in the first 2000 m. Similar observations can be made for Neumayer station (Fig. 5 in supplementary materials). These two results are actually a consequence of a warm (and moist) bias in summer and a cold bias in winter that compensate on average over the year (not shown). The cold winter bias is associated to too frequent low-level easterly flows in the model whereas the warm summer bias can be explained by the location of the nearest grid point in Polar WRF which is closer to the ocean. The model is hence more prone to oceanic influences when the ocean is free of ice. At Mc Murdo station, ERA-I and ERA5 also show realistic temperature median profiles and variability, consistently with the bi-daily assimilation of radiosonde at this station. Polar WRF

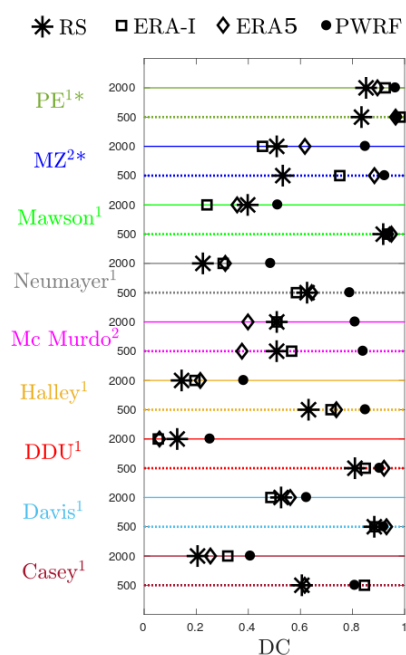

**Figure 6.** Yearly directional constancy at  $z=500$  m (dotted axes) and  $z=2000$  m (solid axes) at nine Antarctic stations. Polar WRF (PWRF), ERA-I and ERA5 data are conditioned to radiosounding (RS) times. Numbers in exponent near station names indicate the number of radiosounding per day at the corresponding station. '\*' symbol labels the two stations for which only data from December to February are shown.

**Table 2.** Values of the median difference/80-20 interquantile difference /95-5 interquantile difference with respect to radiosonde wind speed data at  $z=250$  m (in  $\text{m s}^{-1}$ ) at four Antarctic stations in katabatic regions. DJF and JJA subsets are distinguished.

| station name  | season | ERA-I              | ERA5             | Polar-WRF         |
|---------------|--------|--------------------|------------------|-------------------|
| <b>DDU</b>    | DJF    | 0.021/-0.174/-2.03 | 1.29/-0.98/-2.40 | -1.13/0.85/-0.20  |
|               | JJA    | 3.12/1.20/-0.97    | 4.02/1.73/0.026  | 8.41/3.76/6.34    |
| <b>Davis</b>  | DJF    | 0.73/1.94/3.01     | 1.27/1.94/1.93   | 0.97/4.18/6.92    |
|               | JJA    | 3.56/4.77/3.41     | 3.20/2.46/3.19   | 12.2/10.3/12.4    |
| <b>Casey</b>  | DJF    | 2.80/3.43/1.01     | 0.41/1.23/-1.37  | 3.43/8.69/8.33    |
|               | JJA    | 8.65/7.70/5.44     | 1.82/6.02/6.33   | 9.03/17.2/17.8    |
| <b>Mawson</b> | DJF    | 1.23/-1.71/-0.67   | 0.36/-0.03/1.23  | -0.57/-2.14/-0.67 |
|               | JJA    | 1.22/-0.81/0.20    | 1.50/-0.11/1.02  | 6.20/3.33/5.16    |

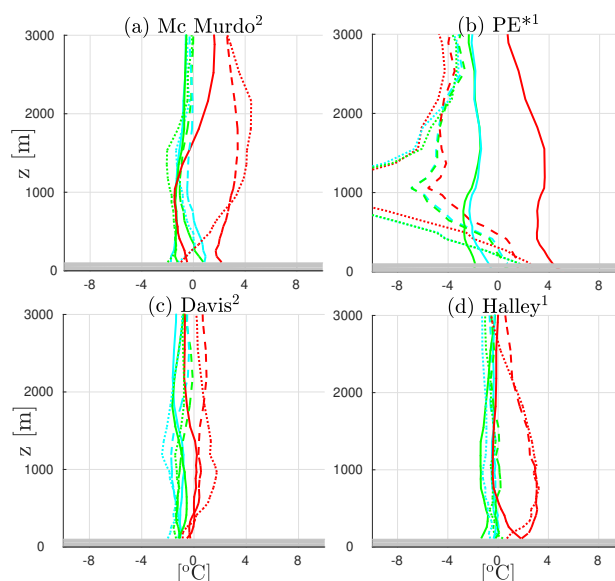

**Figure 7.** Yearly median differences (solid lines), 80-20th interquantile difference (dashed lines) and 95-5th interquantile difference (dotted lines) with respect to radiosoundings for temperature at four Antarctic stations. Red, green and cyan lines refer to Polar WRF, ERA5 and ERA-I respectively. Grey strips delimit the first 100 m above the ground surface. Polar WRF and ERA reanalyses are conditioned to radiosounding times. Numbers in exponent near station names in title indicate the number of radiosounding per day at the corresponding station. '\*' symbol labels the station for which only DJF data are shown.

shows a reasonable median profile but it overestimates the variability. This overestimation can be attributed to too frequent warm (and moist) oceanic influences in spring and autumn (not shown).

The strongest temperature differences between reanalyses and Polar WRF with respect to radiosonde data are at PE station (in summer). Low-level median profiles are too cold by  $\approx 2^\circ\text{C}$  in reanalyses and too warm in by slightly higher values in Polar WRF. The interquantile difference - especially the 95-5th interquantile difference - are underestimated with absolute values exceeding  $10^\circ\text{C}$  at  $z \approx 1000$  m (out of graph limits). This observation actually reflects the absence of deep surface based inversions in Polar WRF and reanalyses at PE in summer at radiosonde launching time. In radiosonde data, the summer inversions are mostly observed in February i.e. in the end of the summer period, when the length of the day period has already reduced. Note that reanalyses and Polar-WRF do reproduce surface-based inversions at PE stations during calm summer nights but their timing does not exactly correspond to radiosounding times.

### 3.2.3 Humidity

ERA reanalyses generally represent well the water vapour content in the low-troposphere at all stations. One exception is at MZ station, where ERA-I and ERA5 significantly underestimate the specific humidity in the first kilometer above the surface in summer with median differences reaching ca.  $-0.50$  and  $-0.85 \text{ g kg}^{-1}$  respectively. Polar WRF show reasonable yearly me-



dian profiles of specific humidity but the interquantiles are overestimated in the first 1000 m at almost all stations (see Fig. 1 in supplementary materials). This is actually explained by a summertime (DJF) overestimation of the water vapour content near the surface, with values reaching for instance 0.5, 1.1, 0.65 g kg<sup>-1</sup> at Davis, DDU, and Mawson stations respectively. One likely cause for this moist bias is an overestimation of the surface water fluxes due to overestimated near surface wind speed at most stations (see Sect. 3.2.1). It should also be specified that near the surface, balloon often sample an air coming from the ice-sheet or an air in the local boundary layer i.e. above the station terrain. However in the model, meshes encompassing coastal stations are heterogeneous i.e. they contain a fraction of land, sometimes sea-ice and/or open ocean. As surface fluxes in a mesh are calculated as the weighted sum of fluxes over each subsurface, the comparison with surface water fluxes with those at an isolated station may thus be flawed. The same conclusion can be drawn for the near surface specific humidity. Note that the comparison of observed summer near-surface humidity with that from the nearest fully continental model grid points is generally more satisfactory (not shown). It is also worth mentioning that in the versions of IFS used to make ERA-I and ERA5, grid boxes with a land fraction value above 0.5 are treated as wholly land while those with a value below 0.5 are treated as ocean. Subsequently, when ERA grid boxes encompassing Antarctic stations are continental, the reanalysed near-surface humidity profiles are not directly affected by fluxes from the ocean.

Regarding the relative humidity, the performances of both reanalyses and Polar-WRF are a little less satisfactory. Generally yearly median and interquantile differences are comprised between -25 and +25 % (see Fig 4 in supplementary materials). Fig.8 depicts the difference of RHi statistics at four stations in four distinct sectors along the East-Antarctic rim. At Halley station (panel b) the median and 80-20th interquantile profiles in the three datasets are reasonable but the 95-5th interquantile is underestimated in the two reanalysis products. Similar conclusions hold for Neumayer station. At DDU station (panel c), one can point out the overestimation of the median RHi and an underestimation of the interquantiles at z=1000 m in particular in ERA-I and Polar WRF. The dry layer corresponding to the katabatic flow is therefore too shallow in the reanalyses and in Polar WRF. At Mawson station (panel d), the three data sets show reasonable median RHi values. However, the interquantiles in the first 1000-1500 m above the surface are overestimated likely due to an excess of water vapor in the lowest atmospheric layers during the summer season. Above 2000 m, the interquantile are underestimated in the three data sets reaching values up to -23 % in ERA-I and ERA5 for the 95-5 interquantile. This is explained by an underestimation of very dry conditions (RHi<30 %) compared to radiosonde data. Note that the performances of reanalyses and Polar WRF at Davis and Casey stations are relatively similar (cf. Fig. 5 in the supplementary materials).

At Mc Murdo station (panel a in Fig.8), the three data sets overestimate the near-surface RHi close to the surface and this occurs both in the summer and winter seasons (not shown). Indeed ERA-I, ERA5 and Polar WRF show a significant increase in RHi (median and percentiles) with decreasing height in the first 500 m above the surface while this feature is much less pronounced in radiosonde data.

A critical point to investigate for the surface mass balance of the ice sheet is the ability of reanalyses and Polar WRF to represent the RHi profiles during precipitation events. Fig. 9 shows the median and interquantile differences of RHi during

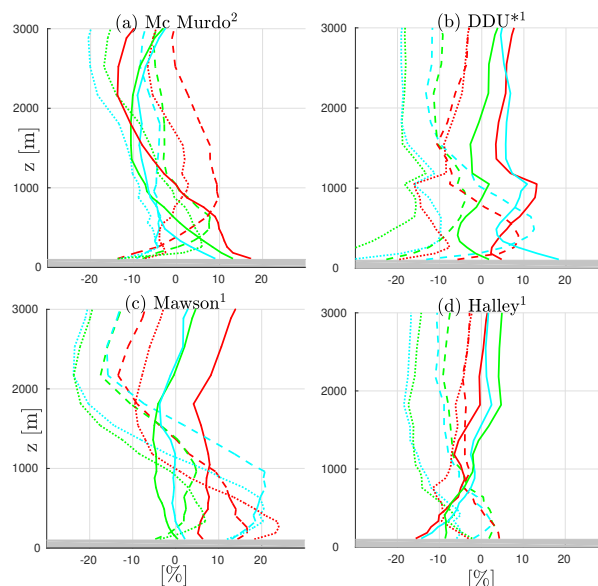

**Figure 8.** Yearly median differences (solid lines), 80-20th interquantile difference (dashed lines) and 95-5th interquantile difference (dotted lines) with respect to radiosoundings of  $RH_i$  at four Antarctic stations. Top panels show the DJF subset, bottom panels the JJA subset. Red, green and cyan lines refer to Polar WRF, ERA5 and ERA-I respectively. Grey strips delimit the first 100 m above the ground surface. Numbers in exponent near station names in title indicate the number of radiosounding per day at the corresponding station.

precipitation cases at Mawson and DDU stations - i.e. the two stations with the most significant decrease in  $RH_i$  in the katabatic layer (cf. Fig. 4) - as well as at Neumayer and Halley stations where the lowest layers saturate or are close to saturations during precipitation events. At Halley and Neumayer the median  $RH_i$  from ERA-I, ERA5 and Polar-WRF are close to radiosonde data. The variability is also correct but a significant underestimation of the 95-5th interquantile can be pointed out in the reanalyses above 1500 m. At Mawson station, ERA5 shows a correct representation of the median profiles and of the variability of  $RH_i$  but ERA-I and Polar-WRF slightly overestimate the median in the first 1000 m. At DDU station, this overestimation is even further marked, with median differences reaching -12 %, -23 % and -29% in ERA5, ERA-I and Polar WRF respectively. Another striking feature at DDU is the very strong underestimation of the interquantiles in the three data sets. Indeed, during precipitation events the simulated and reanalysed atmospheres above the katabatic layer is completely, or almost, saturated leading to an unrealistically weak  $RH_i$  variability.

## 4 Discussion

### 4.1 Spatial and temporal representativity of radiosonde data

As radiosoundings sample the atmosphere once or twice a day at a given specific location, one can question the temporal and spatial representativity of the statistics presented in Sect. 3.1. One can indeed wonder to what extent an analysis based



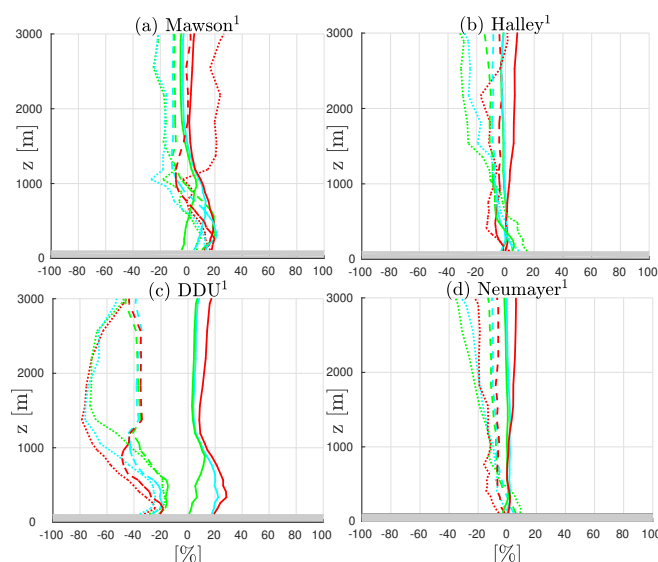

**Figure 9.** Yearly median differences (solid lines), 80-20th interquantile difference (dashed lines) and 95-5th interquantile difference (dotted lines) with respect to radiosoundings for RHi during precipitation events at Mawson, DDU, Halley and Neumayer stations. Red, green and cyan lines refer to Polar WRF, ERA5 and ERA-I respectively. Grey strips delimit the first 100 m above the ground surface. Polar WRF and ERA reanalyses are conditioned to radiosounding times. Mind the different horizontal axis compared to Fig. 8.

on radiosonde profiles provide a realistic picture of the whole - i.e. including the daily variability - temporal statistics at a given station and to what spatial extent the profiles at the nine Antarctic stations are representative of the full coastal rim of East-Antarctica.

Fig. 10 provides some elements of response about the temporal representativity by comparing the statistical profiles of wind speed and temperature at four stations from ERA5 reanalyses considering the full data set (magenta profiles) or the subset conditioned to radiosonde times (green profiles). During winter (panels c, d, g and h), median and 20-80th interquantile profiles are almost superimposed, suggesting that the 8-year period considered here is sufficiently long so that subsampling at radiosonde time does not significantly change the winter statistics. In summer, one could expect a larger difference between both data sets since the insolation evolves with a diurnal cycle which may affect the diurnal variability of the boundary layer. At Mc Murdo (panel a), almost no difference between magenta and green profiles can be underlined, reflecting that the bi-daily sampling (00 and 12 UTC) is sufficient to capture most of the variability at the multi-annual scale. At Mawson station, the wind and temperature profiles slightly differ in the first 1000 m above the surface. Wind and temperature subsampled at sounding times exhibit a lower variability, and they are respectively stronger and higher. This is in agreement with the fact that sondes at Mawson are launched at 16 Local Time, i.e. during the diurnal warm phase of the boundary-layer. At Halley station, King et al. (2006) underlines the very weak diurnal cycle of near-surface temperature and the absence of diurnal variations of wind speed and boundary-layer height during summer at Halley. This is due to the great partitioning of incoming radiative energy at the surface into latent heat flux. This leads to a clear diurnal cycle in near-surface relative humidity (King and Anderson, 1999) but which



also acts as damping the near-surface air temperature variations and the thermal mixing in the boundary layer. The superim-  
 position of green and magenta curves in Fig. 10d is consistent with these conclusions. At DDU station, the summer boundary  
 layer does evolve with a diurnal cycle (Gallée and Pettré, 1998) in particular due to the alternance of daytime sea breezes and  
 nocturnal katabatic winds. Particularly when the DDU island and the near ocean are free of snow/ice free convection can even  
 occur (Argentini et al., 1996) during daytime in calm wind conditions. In the ERA5 data set, the DDU summer profiles show a  
 diurnal cycle with warmer near-surface temperatures and weaker wind speed during daytime than during nighttime. However,  
 Fig. 10b shows that the 8-year summer statistics conditioned to the sonde launching time (12 UTC, 10 Local Time) are very  
 close to the full summer statistics. This apparent coincidence may be explained by the timing of the sonde launching which  
 does not correspond neither to the middle part of the nocturnal katabatic phase nor to the most pronounced phase of the diurnal  
 boundary layer.

To assess the spatial representativity of radiosoundings, we have identified spatial "footprints" of each station using ERA5  
 data. In other words, we have estimated for each station the spatial neighbourhood over which the structure of the low-  
 troposphere is similar to that at the station. For this purpose, we have calculated the overlaps of the 8-year distributions of  
 wind speed and temperature at two representative vertical levels at every grid point with those at the station grid point (see  
 details in Appendix B). We have then made maps associated to each station showing for every grid point the minimum value  
 among the four independent overlaps (see Fig.11). We can point out that the statistical properties of the low-troposphere at  
 the nine stations can be reasonably extended to a significant part of coastal Antarctica. In particular, the structure of the low-  
 troposphere over Halley and Neumayer is representative of those over many ice shelves and coastal margins, with regions for  
 which the overlap exceeds 85 % even thousands of kilometers far from the stations. On another hand the "footprint" of MZ,  
 PE, Casey and Mc Murdo is limited to relatively small areas indicating that the shape of the profiles at these stations is quite  
 regional. DDU, Mawson and Davis seem reasonably representative of a significant part of the coastal edge, but the percent-  
 age overlap rarely exceeds 80 % indicating that a part of their wind and temperature and wind distributions are explained by  
 regional effects. Note that our method of footprints determination does not consider the full profiles but only two representa-  
 tive vertical levels ( $z=500$  m and  $z=2000$  m). Further studies are therefore needed to more precisely characterize the spatial  
 variability of the full profiles along the Antarctic rim, making use for instance of radiosonde data at extra coastal stations like  
 Syowa or Novolazarevskaya.

## 4.2 From ERA-Interim to ERA5: additional insights into the performance of reanalyses

In section Sect. 3.2, we evaluated the performances of ERA-I and ERA5 reanalyses using median and interquantile differences.  
 With this method, it could be shown that both reanalysis products have reasonable and comparable performances in terms of  
 temperature profiles. In terms of wind speed, both reanalyses show similar results even though ERA5 was slightly closer to  
 radiosonde data near the surface at Neumayer and Casey. The comparison of the performances for the two data sets is more  
 complex for the relative humidity because of very different discrepancies from one station to another.

To better discriminate ERA-I and ERA5, we have plotted the mean biases and the root mean square errors (RMSE) with  
 respect to radiosoundings at seven stations in Fig. 12. The concomitant comparison inherent to the use of mean bias and RMSE

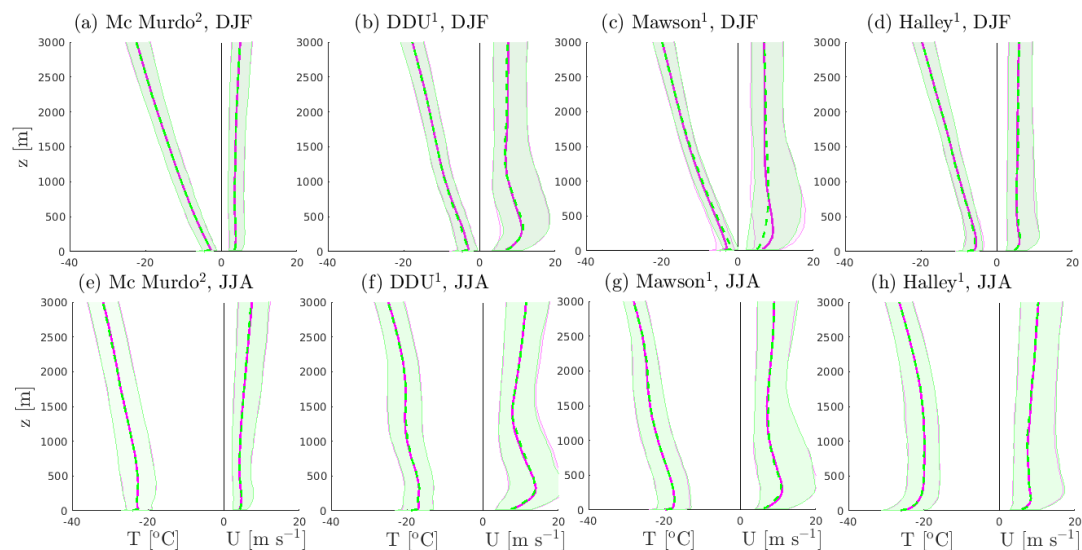

**Figure 10.** Vertical statistics of temperature (left part of panels) and wind speed (right part of panels) in DJF (top row) and JJA (bottom row) from ERA5 reanalyses at four Antarctic stations. Dashed green lines (resp. solid magenta lines) show the medians of the ERA5 data set restricted to radiosonde launching times (resp. of the full ERA5 data set). Color shadings delimit the associated 80-20th interquartiles. Numbers in exponent near station names in title indicate the number of radiosounding per day at the corresponding station.

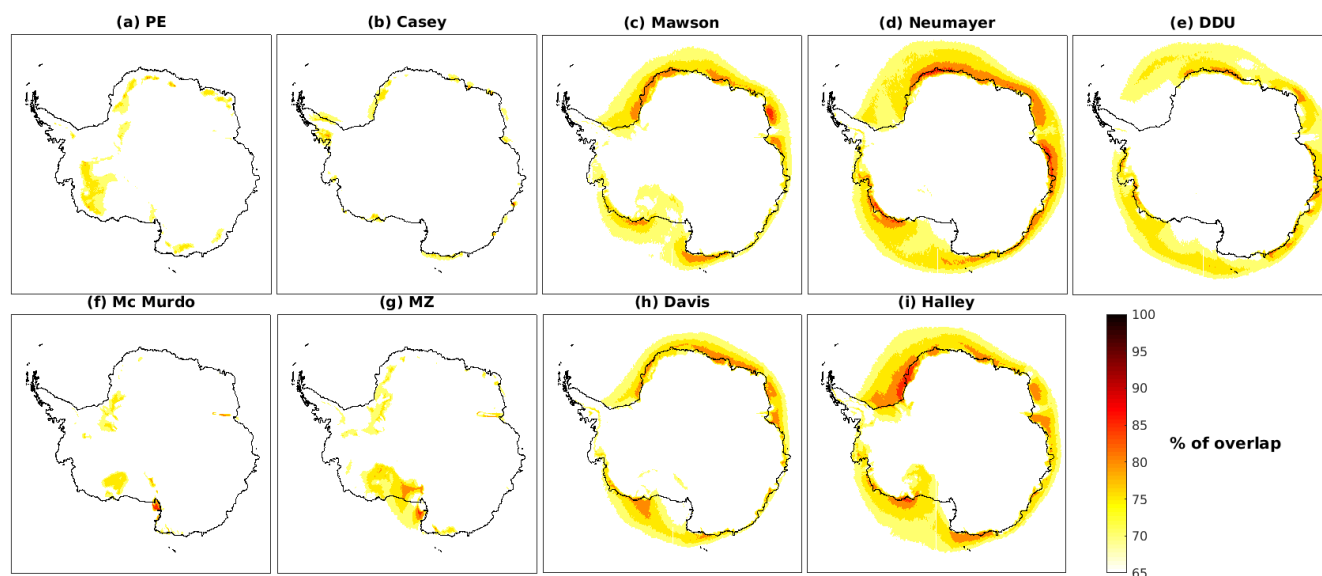

**Figure 11.** Spatial representativity of the low-troposphere at the nine Antarctic stations. For each station (panel), colors indicate the maximum value reached by all the four overlaps between the independent distributions of the 500 m temperature, 2000 m temperature, 500 m wind speed and 2000 m wind speed at the ERA5 grid point with those at the station.

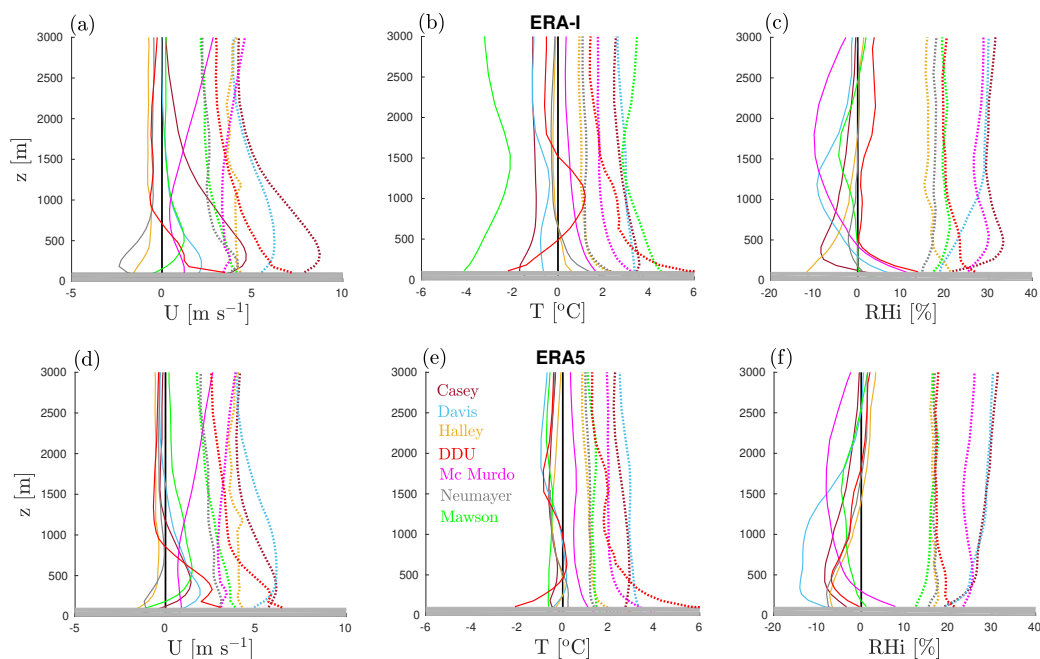

**Figure 12.** Mean bias (solid lines) and root mean square errors (dotted lines) in ERA-I (top row) and ERA5 (bottom row) with respect to radiosoundings at seven permanent Antarctic stations. Panels a and c show results for the wind speed, panels b and d results for the temperature and panels c and e results for the relative humidity with respect to ice.

scores is relevant for these two products since the timing of the real circulation and the one in reanalyses should be in principle close to each other, especially near stations where radiosonde data are assimilated. One can notice that mean bias and RMSE curves are generally closer to the zero line for the ERA5 data set (bottom row) shedding light on the overall improvement from ERA-I to ERA5. It is beyond the scope of the present study to pinpoint the specific changes between the two reanalyses data sets that led to the reduction of errors. However, one may assume that the refinement of both horizontal and vertical grids have significantly contributed to this improvement. However, Fig. 12 also highlights substantial deficiencies still present in ERA5, particularly the large RMSE of RHi - exceeding 20 % at Neumayer, Mc Murdo, Davis and DDU- and of wind speed that can exceed  $5 \text{ m s}^{-1}$  at DDU, Casey and Davis.

### 4.3 Sensitivity of Polar WRF simulations

Among the deficiencies identified in Polar WRF in Sect. 3.2, the **too shallow and too strong low-level jet** at DDU, Casey, Mawson, Davis, Neumayer and Halley stations was particularly striking. To gain insights into the ability of Polar WRF in reproducing the low-level wind profiles over coastal East-Antarctica, we carried out sensitivity tests to the turbulence scheme and to the vertical resolution with the same set-up as the one described in Sect. 2.3. Using the more diffusive MYJ turbulence scheme instead of MYNN produces a slightly weaker and thicker wind jet but does not lead to major changes in the simulation.



Moreover increasing the vertical resolution from 23 to 40 levels in the first 3000 m a.g.l. does not significantly improve the

5 the annual or seasonal statistics of the simulated profiles (not shown). Van den Broeke and Van Lipzig (2003) and Gallée and Pettré (1998) have stressed the importance of the slowing down of katabatic winds at the Antarctic edges by thermal wind effects due to either sea-breezes or to the piling-up of cold air over ice shelves or sea-ice leading to a ocean-continent pressure gradient force. In order to evaluate the ability of Polar WRF to reproduce this effect and to assess the sensitivity of the model's horizontal resolution we have thus set-up a new simulation (see Appendix A) that focuses on the DDU region. As seen in

10 Sect. 4.1, the regional dynamics at DDU is not completely representative of the whole East-Antarctic coast but Van den Broeke and Van Lipzig (2003) showed that the thermal wind effect occurs along almost all the edge of Antarctica (see their Figure 11). This suggests that if Polar WRF fails in reproducing this process in Adélie Land, it may fail over many other regions along the ice sheet. The winter latitude-height cross section of the potential temperature is shown in Fig. 13 for simulations at 27, 9 and 3 km resolution. The wind speed profiles at four locations on the continent-ocean transect (among which DDU) are also plotted.

15 The wind speed profiles at  $-66.97^\circ$  latitude are relatively similar for the three resolutions. This suggests that a 27 km resolution (panel a) may be sufficient for modeling the wind over the slopes of this region of the ice sheet, but further comparison with in situ data is needed to ascertain this assumption. Moving towards the edge of the continent, one can also point out that at a resolution of 27 km (panel a) the cold air bump is shallower and does not extend inland. Indeed at low resolution, the flow from the ice sheet spreads out over the sea-ice or ocean rather than vertically accumulating particularly owing to the size of the

20 meshes. As a consequence, the associated pressure gradient force towards the ice sheet, the slowing down of the near-surface jet over the margins and the subsequent damping and thickening of the katabatic layer are much weaker in coarse resolution simulations. Mean vertical profiles at 3 and 9 km resolution thus compare better with radiosonde observations (panels d, e and f, see also the specific methodology for high-resolution simulations and radiosonde data in Appendix C). However panel c and f in Fig. 13 also shows that a shallow wind jet very close to the surface in the mean wind profile at DDU station even at 3

25 km resolution. This jet disappears a few kilometers downstream. Increasing the horizontal resolution up to 3 km has helped to reproduce the general behaviour of the flow over the coastal margin, but a near-surface wind bias remain at the specific location of DDU. As DDU is located on a small rocky island (Petrel island), one may suspect local orographic effects on the near surface flow that cannot be reproduced even at a resolution of 3 km. This issue should be addressed in the future.

30 Even though this short analysis does not provide a full explanation of the wind biases in the Polar WRF simulation over the whole Antarctic coast, it suggests that the 35 km horizontal resolution is not sufficient to reproduce the sharp gradients of temperature, pressure and wind at the coastal edge. This point questions the ability of current general circulation model but also regional models that run at resolutions of several tens of kilometers (e.g., Agosta et al., 2018; van Wessem and coauthors, 2018) to correctly reproduce the structure of the low-troposphere over coastal Antarctic margins, the horizontal extent of katabatic winds and the LSP process.

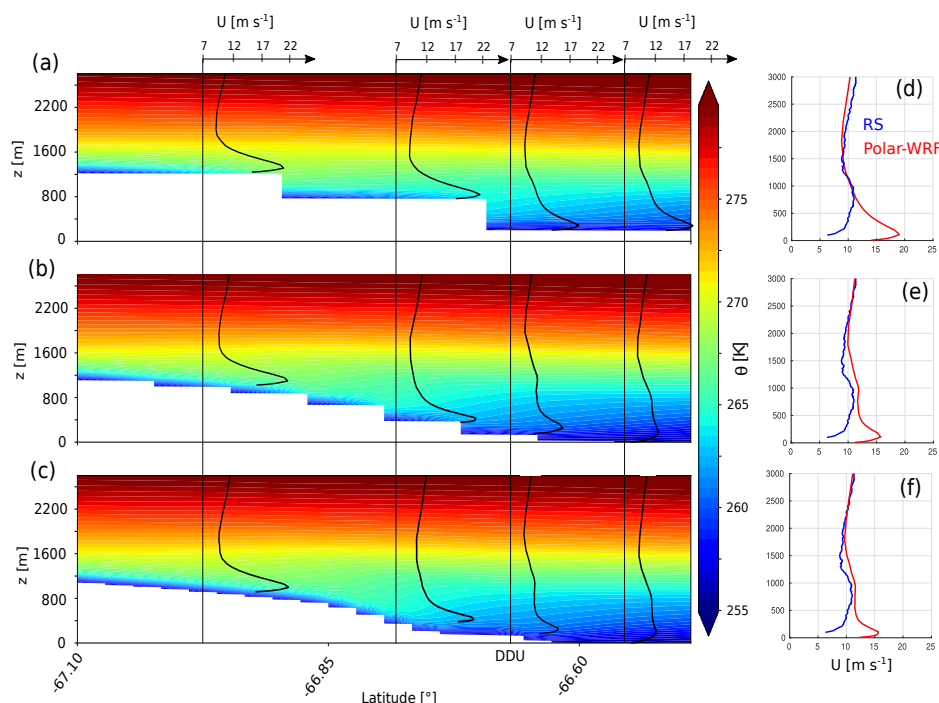

**Figure 13.** a-c: Meridional cross section (longitude=140.00°) of the June-July-August mean potential temperature around DDU in Polar WRF simulations at 27 km resolution (panel a), 9 km resolution (panel b) and 3 km resolution (panel c). June-July-August mean vertical profiles of the wind speed at four locations along a continent-ocean transect are also plotted. d-f: Mean JJA vertical profiles of wind speed at DDU station. Blue lines refers to the 2010-2017 radiosonde (RS) data set, red lines to Polar WRF simulations at 27 km resolution (panel d), 9 km resolution (panel e) and 3 km resolution (panel f). In panel e and f, Polar WRF vertical profiles are computed following the method in Appendix C for more consistent comparison with radiosonde data.

## 5 Conclusions

- This study employs high vertical resolution data sets of radiosonde data at nine Antarctic stations to characterize the fine vertical structure of the low-troposphere over the coastal margins of East-Antarctica and to assess the performances of ERA-I, ERA5 and Polar WRF. The examination of radiosonde data has revealed a large spatial variability of the vertical profiles along the East-Antarctic coast, with in particular strong differences between profiles at stations over ice shelves, stations in katabatic regions and stations in the Ross sea sector with complex orographic influences. The seasonal variations have been portrayed here by comparing DJF and JJA ensembles. The analysis has shown higher wind speeds in winter than in summer at most stations in agreement with more stable boundary layers over the Plateau - and subsequent more intense downslope flows - and to a lesser extent to stronger synoptic pressure gradients. However, the wind profiles at DDU show similar speeds in both winter





and summer. This point underlines the critical role of slowing down mechanisms probably associated to thermal wind effects which are particularly intense in Adélie Land during winter. During precipitation events, winds are generally stronger due to the increase in the pressure gradient force ~~associated to the transit of the synoptic weather system~~. The inspection of relative humidity profiles suggests that the LSP frequently occurs at DDU, Casey, Davis and Mawson stations, but this phenomenon does not appreciably affect precipitation at Neumayer and Halley. Both reanalysis products as well as Polar WRF overestimate the low-level wind speed in katabatic regions. Additional Polar WRF simulations at different resolutions over DDU suggest that this may be a consequence of an underestimated coastal thermal wind effect associated to the piling-up of cold air when the resolution is too coarse. ERA5 reanalysis overall better ~~compare~~ with radiosonde data than ERA-I but significant biases remain, particularly for the wind speed and relative humidity in katabatic regions. Moreover large wind and temperature differences with similar amplitude as Polar-WRF have been noticed in both reanalyses at PE station during summer. This may suggest that the reasonably correct performances of reanalyses at several stations are in a significant part due to the assimilation of the local radiosoundings, inviting to a further evaluation of the free IFS model. Furthermore, although the statistics calculated from ERA5 vertical profiles at a daily or bi-daily frequency provide a reasonable view of the complete statistics at the yearly and seasonal scales, the present paper has not discussed the diurnal evolution of the coastal low troposphere, which can be particularly marked in summer due to the diurnal cycle of insolation. The intensive observational campaign associated to the Year Of Polar Prediction project that will take place in the summer 2018-2019 should provide an unprecedented set of radiosonde data with more than 2000 extra sonde launches. In complement to existing literature on this subject, these additional radiosoundings could allow to gain insights into the sub-daily variations of the vertical structure of the low troposphere at many Antarctic locations.

Finally, this study has also emphasized the importance of correctly representing the meridional gradient of temperature and the cold air bump at the bottom of the ice sheet to satisfactorily simulate the horizontal extent of the continental flow. To improve the cyclogenesis at the shore of the ice sheet (Bromwich et al., 2011), the formation of sea ice and the creation of oceanic bottom waters in coupled climate models (e.g., Barthélemy et al., 2012), observational and modeling efforts should be made in the future to evaluate and improve horizontal structure of the coastal Antarctic boundary layer, in line with the IAGO campaign for instance (Pettre and André, 1991).

*Acknowledgements.* This work was funded by the EPFL-LOSUMEA project. We thank C. Genthon and P. Pettre for insightful comments on a preliminary version of the manuscript. We also thank M. Lehning, V Sharma, J. Gehring, L. Cortes, and R. Forbes for helpful discussions and C. Listowski for providing the topography data for Polar WRF. We are grateful to S. Colwell and the British Antarctic Survey for providing radiosonde data at Halley station. For the provision of the radiosounding data at PE we thank the Royal Meteorological Institute of Belgium and the respective operators of PE station. Radiosoundings during the 2013/2014 summer season were done with the Vaisala Marwin ground receiving system, provided by the Swiss Federal Institute for Forest, Snow and Landscape Research. We thank Météo France, the DSO/DOA service for the acquisition and distribution of radiosonde data at DDU station. MZ radiosonde data and information were obtained from 'Météo Climatological Observatory at MZS and Victoria Land' of PNRA (<http://www.climantartide.it>), with the help of



- C. Scarchilli. Radiosonde measurements at Neumayer station have been made freely available on the PANGAEA platform (<https://doi.org/10.1594/PANGAEA.874564>) and technical information was provided by H. Schmithuesen. S. Alexander and the Australian Bureau Of Meteorology are also gratefully acknowledged for distributing the radiosonde data at Mawson, Davis and Casey stations. The authors appreciate the support of the University of Wisconsin-Madison Antarctic Meteorological Research Center and the help of M. Lazzara for acquiring and distributing radiosonde data at Mc Murdo (<http://amrc.ssec.wisc.edu>). Last but not least, we are grateful to the scientific and winterover staffs at Antarctic stations for acquiring radiosonde data every day in the harsh Antarctic conditions.
- 10 *Author contributions.* EV and AB designed the study, analysed the results and wrote the manuscript. EV carried out the Polar WRF simulations, processed reanalyses and radiosonde data and produced the figures. OT provided technical expertise and contributed to the scientific interpretation of the results.

*Competing interests.* The authors declare that they have no conflict of interest.

## Appendix A: Polar WRF simulation over Dumont d'Urville

- 15 To investigate the sensitivity of the Polar-WRF model over coastal East-Antarctica to the horizontal resolution, we have set up a second simulation. The model has been run with a downscaling method where a 27 km resolution domain contains a 9 km resolution nest, which itself contains a smaller nest at 3 km resolution centred over DDU (see Fig. A1). The nudging is one way i.e. no information is passed in return from one domain to its parent. The simulation has been run over the whole year 2016 with a 3-day spin-up. External and initial conditions are provided by ERA5 reanalyses. The same physical package as the
- 20 one used for the Antarctic scale simulations (see Sect. 2.3) has been used except that the cumulus scheme has been turned off in the 3 km resolution domain.

## Appendix B: Spatial representativity of temperature and wind at coastal Antarctic stations

- To assess the spatial representativity of the temperature and wind in the low troposphere above given Antarctic stations, we have calculated the spatial 'footprint' of each station. In other words, we have determined the neighbourhoods over which the
- 25 8-year statistics of temperature and wind speed are close to those at the corresponding stations. The method we have employed is the following. We have calculated the 8-year distributions of wind speed and temperature at  $z=500$  m a.g.l. and  $z=2000$  m a.g.l. (the four variables are taken separately) at each grid point in the hourly ERA5 reanalyses. The two heights  $z=500$  m and  $z=2000$  m were chosen because they correspond to one level in the core of the boundary layer and to one level slightly above. Then overlaps of the distributions of each of the four variables at each grid point with those at the Antarctic stations have been computed. We then quantify the statistical similarity between one grid point and a station by the minimum value

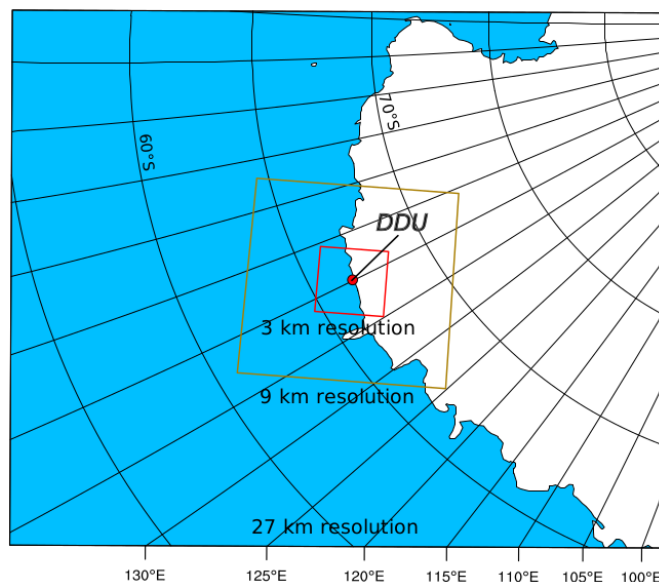

**Figure A1.** Map of the three domains of the Polar-WRF simulation for the specific case study over the DDU region.

among the four overlaps corresponding to the four independent variables. Note that adding the humidity in this method does  
 5 not have a significant impact on the definition of the footprints.

### Appendix C: Radiosonde-following profiles from high-resolution Polar WRF simulations

At high horizontal resolution, it is not appropriate to evaluate the vertical profiles over a single model grid point with a  
 radiosounding owing to the horizontal drift of the sonde. To make a more consistent comparison, we simulate the motion of a  
 virtual sonde in the model space. The sonde takes off at the station and is supposed to rise with a constant vertical velocity of 5  
 10  $\text{m s}^{-1}$ . The horizontal advection of the sonde in the model space is accounting for assuming the stationarity of the horizontal  
 flow during the ascent. Then, we create an artificial sounding by sampling the model atmosphere following the trajectory of  
 the virtual sonde (using the nearest model grid point at each height during the ascent). In panels e and f in Fig. 13, the model  
 profiles are generated with this method. It is however worth noting that in the first 3000 m above the ground surface, the virtual  
 balloon has not had the time to drift over a large distance from its original position (about 15 km at the very maximum). As a  
 consequence, the new profiles remain relatively close to those right above the station, especially close to the surface.



## References

- 5 Adams, N.: Identifying the Characteristics of Strong Southerly Wind Events at Casey Station in East Antarctica Using a Numerical Weather Prediction System, *Monthly Weather Review*, 133, 3548–3561, <https://doi.org/10.1175/MWR3050.1>, 2005.
- Agosta, C., Amory, C., Kittel, C., Orsi, A., Favier, V., Gallée, H., van den Broeke M. R., Lenaerts, J. T. M., van Wessem, J. M., and Fettweis, W.: Estimation of the ANtarctic surface mass balance using MAR (1979–2015) and identification of dominant processes, *The Cryosphere Discuss.*, 2018, 1–22, doi: 10.5194/tc-2018-76, 2018.
- 10 Alexander, S. and Murphy, D.: The Seasonal Cycle of Lower-Tropospheric Gravity Wave Activity at Davis, Antarctica (69°S, 78°E), *Journal of the Atmospheric Sciences*, 72, 1010–1021, <https://doi.org/10.1175/JAS-D-14-0171.1>, 2015.
- Amory, C., Gallée, H., Naaim-Bouvet, F., Favier, V., Vignon, E., Picard, G., Trouvilliez, A., Piard, L., Genthon, C., and Bellot, H.: Seasonal variations in drag coefficients over a sastrugi-covered snowfield of coastal East Antarctica, *Boundary-Layer Meteorol.*, 164, 107–133, doi: 10.1007/s10546-017-0242-5, 2017.
- 15 Argentini, S. and Mastrantonio, G.: Barrier winds recorded during two summer Antarctic campaigns and their interaction with the katabatic flows as observed by a tri-axial Doppler sodar, *International Journal of Remote Sensing*, 15, 455–466, <https://doi.org/10.1080/01431169408954086>, 1994.
- Argentini, S., Mastrantonio, G., Viola, A., Pettre, P., and Dargaud, G.: Sodar performance and preliminary results after one year of measurements at Adelie land coast, east Antarctica, *Boundary-Layer Meteorology*, 81, 75–103, <https://doi.org/10.1007/BF00119401>, 1996.
- 20 Barthélemy, A., Goose, H., Mathiot, P., and Fichet, T.: Inclusion of a katabatic wind correction in a coarse-resolution global coupled climate model, *Ocean Modelling*, 48, 45–54, doi:10.1007/s10546-017-0304-8, 2012.
- Bintanja, R.: Mesoscale Meteorological Conditions in Dronning Maud Land, Antarctica, during Summer: A Qualitative Analysis of Forcing Mechanisms, *Journal of Applied Meteorology*, 39, 2348–2370, [https://doi.org/10.1175/1520-0450\(2000\)039<2348:MMCIDM>2.0.CO;2](https://doi.org/10.1175/1520-0450(2000)039<2348:MMCIDM>2.0.CO;2), 2000.
- 25 Bintanja, R., Severijns, C., Haarsma, R., and Hazeleger, W.: The future of Antarctica's surface winds simulated by a high-resolution global climate model: 1. Model description and validation, *Journal of Geophysical Research: Atmospheres*, 119, 7136–7159, <https://doi.org/10.1002/2013JD020847>, 2014.
- Bock, O., Bosser, P., Bourcy, T., David, L., Goutail, F., Hoareau, C., Keckhut, P., Legain, D., Pazmino, A., Pelon, J., Pipis, K., Pouljol, G., Sarkissian, A., Thom, C., Tournois, G., and Tzanos, D.: Accuracy assessment of water vapour measurements from in situ and remote sensing techniques during the DEMEVAP 2011 campaign at OHP, *Atmospheric Measurement Techniques*, 6, 2777–2802, <https://doi.org/10.5194/amt-6-2777-2013>, 2013.
- Bracegirdle, T. J. and Marshall, G. J.: The Reliability of Antarctic Tropospheric Pressure and Temperature in the Latest Global Reanalyses, *Journal of Climate*, 25, 7138–7146, <https://doi.org/10.1175/JCLI-D-11-00685.1>, 2012.
- Bromwich, D. H., Steinhoff, D. F., Simmonds, I., Keay, K., and Fogt, R. L.: Climatological aspects of cyclogenesis near Adélie Land Antarctica, *Tellus A*, 63, 921–938, <https://doi.org/10.1111/j.1600-0870.2011.00537.x>, 2011.
- 30 Bromwich, D. H., Otieno, F. O., Hines, K. M., Manning, K. W., and Shilo, E.: Comprehensive evaluation of polar weather research and forecasting model performance in the Antarctic, *Journal of Geophysical Research: Atmospheres*, 118, 274–292, <https://doi.org/10.1029/2012JD018139>, 2013.



- Carrasco, J. F., Bromwich, D. H., and Monaghan, A. J.: Distribution and Characteristics of Mesoscale Cyclones in the Antarctic: Ross Sea Eastward to the Weddell Sea, *Monthly Weather Review*, 131, 289–301, [https://doi.org/10.1175/1520-0493\(2003\)131<0289:DACOMC>2.0.CO;2](https://doi.org/10.1175/1520-0493(2003)131<0289:DACOMC>2.0.CO;2), 2003.
- Connolley, W. M. and King, J. C.: Atmospheric water-vapour transport to Antarctica inferred from radiosonde data, *Quarterly Journal of the Royal Meteorological Society*, 119, 325–342, <https://doi.org/10.1002/qj.49711951006>, 1993.
- Dare, R. A. and Budd, W. F.: Analysis of Surface Winds at Mawson, Antarctica, *Weather and Forecasting*, 16, 416–431, [https://doi.org/10.1175/1520-0434\(2001\)016<0416:AOSWAM>2.0.CO;2](https://doi.org/10.1175/1520-0434(2001)016<0416:AOSWAM>2.0.CO;2), 2001.
- Deb, P., Andrew, O., Scott, H. J., Tony, P., John, T., Daniel, B., O., P. J., and Steve, C.: An assessment of the Polar Weather Research and Forecasting (WRF) model representation of near-surface meteorological variables over West Antarctica, *Journal of Geophysical Research: Atmospheres*, 121, 1532–1548, <https://doi.org/10.1002/2015JD024037>, 2016.
- Dee, D., Uppala, S., Simmons, A., Berrisford, P., Poli, P., Kobayashi, S., Andrae, U., Balmaseda, M., Balsamo, G., Bauer, P., et al.: The ERA-Interim reanalysis: Configuration and performance of the data assimilation system, *Q J R Meteorol Soc*, 137, 553–597, 2011.
- Dufour, A., Charrondière, C., and Zolina, O.: Analysed and observed moisture transport as a proxy for snow accumulation in East Antarctica, *The Cryosphere Discussions*, 2018, 1–23, <https://doi.org/10.5194/tc-2018-156>, <https://www.the-cryosphere-discuss.net/tc-2018-156/>, 2018.
- Durán-Alarcón, C., Boudevillain, B., Genthon, C., Grazioli, J., Souverijns, N., van Lipzig, N. P. M., Gorodetskaya, I., and Berne, A.: The vertical structure of precipitation at two stations in East Antarctica derived from micro rain radars, *The Cryosphere Discussions*, 2018, 1–24, <https://doi.org/10.5194/tc-2018-153>, <https://www.the-cryosphere-discuss.net/tc-2018-153/>, 2018.
- Fretwell, P., Pritchard, H. D., Vaughan, D. G., Bamber, J. L., Barrand, N. E., Bell, R., Bianchi, C., Bingham, R. G., Blankenship, D. D., Casassa, G., Catania, G., Callens, D., Conway, H., Cook, A. J., Corr, H. F. J., Damaske, D., Damm, V., Ferraccioli, F., Forsberg, R., Fujita, S., Gim, Y., Gogineni, P., Griggs, J. A., Hindmarsh, R. C. A., Holmlund, P., Holt, J. W., Jacobel, R. W., Jenkins, A., Jokar, W., Jordan, T., King, E. C., Kohler, J., Krabill, W., Riger-Kusk, M., Langley, K. A., Leitchenkov, G., Leuschen, C., Luyendyk, B. P., Matsuoka, K., Mouginot, J., Nitsche, F. O., Nogi, Y., Nost, O. A., Popov, S. V., Rignot, E., Rippin, D. M., Rivera, A., Roberts, J., Ross, N., Siegert, M. J., Smith, A. M., Steinhage, D., Studinger, M., Sun, B., Tinto, B. K., Welch, B. C., Wilson, D., Young, D. A., Xiangbin, C., and Zirizzotti, A.: Bedmap2: improved ice bed, surface and thickness datasets for Antarctica, *The Cryosphere*, 7, 375–393, <https://doi.org/10.5194/tc-7-375-2013>, 2013.
- Gallée, H. and Pettré, P.: Dynamical Constraints on Katabatic Wind Cessation in Adélie Land, Antarctica, *Journal of the Atmospheric Sciences*, 55, 1755–1770, [https://doi.org/10.1175/1520-0469\(1998\)055<1755:DCOKWC>2.0.CO;2](https://doi.org/10.1175/1520-0469(1998)055<1755:DCOKWC>2.0.CO;2), 1998.
- Gallée, H. and Schayes, G.: Development of a three-dimensional meso-gamma primitive equation model, katabatic winds simulation in the area of Terra Nova Bay, Antarctica, *Mon Weather Rev*, 12, 671–685, 1994.
- Gallée, H., Pettré, P., and Schayes, G.: Sudden cessation of katabatic winds in Adélie Land, Antarctica, *Journal of Applied Meteorology*, 35, 1142–1152, 1996.
- Genthon, C. and Krinner, G.: Convergence and disposal of energy and moisture on the Antarctic polar cap from ECMWF reanalyses and forecasts, *J Clim*, 11, 1703–1716, 1998.
- Gera, B. S., Argentini, S., Mastrantonio, G., Viola, A., and Weill, A.: Characteristics of the boundary layer thermal structure at a coastal region of Adélie Land, East Antarctica, *Antarctic Science*, 10, 89–98, <https://doi.org/10.1017/S0954102098000121>, 1998.



- Grazioli, J., Genthon, C., Boudevillain, B., Duran-Alarcon, C., Del Guasta, M., Madeleine, J.-B., and Berne, A.: Measurements of precipitation in Dumont d'Urville, Adélie Land, East Antarctica, *The Cryosphere*, 11, 1797–1811, <https://doi.org/10.5194/tc-11-1797-2017>, 2017a.
- Grazioli, J., Madeleine, J.-B., Gallée, H., Forbes, R. M., Genthon, C., Krinner, G., and Berne, A.: Katabatic winds diminish precipitation contribution to the Antarctic ice mass balance, *Proceedings of the National Academy of Sciences*, 114, 10 858–10 863, <https://doi.org/10.1073/pnas.1707633114>, 2017b.
- 10 Ingleby, B.: An assessment of different radiosonde type 2015/2016, ECMWF Technical Memorandum, 807, 2017.
- King, J. C.: Low-level wind profiles at an Antarctic coastal station, *Antarctic Science*, 1, 169–178, 1989.
- King, J. C. and Anderson, P. S.: A humidity climatology for Halley, Antarctica, based on frost-point hygrometer measurements, *Antarctic Science*, 11, 100–104, 1999.
- King, J. C., Argentini, S. A., and Anderson, P. S.: Contrasts between the summertime surface energy balance and boundary layer structure at Dome C and Halley stations, Antarctica, *J Geophys Res*, 111, doi:10.1029/2005JD006130, 2006.
- 15 Kottmeier, C.: The influence of baroclinicity and stability on the wind and temperature conditions at the Georg von Neumayer Antarctic station, *Tellus*, 38A, 263–276, 1986.
- König-Langlo, G., King, J. C., and Pettré, P.: Climatology of the three coastal Antarctic stations Dumont d'Urville, Neumayer, and Halley, *Journal of Geophysical Research: Atmospheres*, 103, 10 935–10 946, <https://doi.org/10.1029/97JD00527>, 1998.
- 20 Lenaerts, J. T. M., van den Broeke, M. R., Déry, S. J., van Meijgaard, E., van de Berg, W. J., Palm, S. P., and Sanz Rodrigo, J.: Modeling drifting snow in Antarctica with a regional climate model: 1. Methods and model evaluation, *Journal of Geophysical Research: Atmospheres*, 117, <https://doi.org/10.1029/2011JD016145>, d05108, 2012.
- Listowski, C. and Lachlan-Cope, T.: The microphysics of clouds over the Antarctic Peninsula – Part 2: modelling aspects within Polar WRF, *Atmospheric Chemistry and Physics*, 17, 10 195–10 221, <https://doi.org/10.5194/acp-17-10195-2017>, 2017.
- 25 Mawson, S. D.: *The home of the blizzard*, Unabridged, 1915.
- Milosevich, L. M., Paukkunen, A., Vömel, H., and Oltmans, S. J.: Development and Validation of a Time-Lag Correction for Vaisala Radiosonde Humidity Measurements, *J Atmos Oceanic Technol*, 21, 1305–1327, doi:10.1175/1520-0426(2004)021<1305:DAVOAT>2.0.CO;2, 2004.
- Monaghan, A. J., Bromwich, D. H., Powers, J. G., and Manning, K. W.: The Climate of the McMurdo, Antarctica, Region as Represented by One Year of Forecasts from the Antarctic Mesoscale Prediction System, *Journal of Climate*, 18, 1174–1189, <https://doi.org/10.1175/JCLI3336.1>, 2005.
- 30 Morrison, H., Thompson, G., and Tatarskii, V.: Impact of Cloud Microphysics on the Development of Trailing Stratiform Precipitation in a Simulated Squall Line: Comparison of One- and Two-Moment Schemes, *Monthly Weather Review*, 137, 991–1007, <https://doi.org/10.1175/2008MWR2556.1>, 2009.
- 35 Naithani, J., Argentini, S., and Schayes, G.: Marine air intrusion into the Adelie Land sector of East Antarctica: A study using the regional climate model (MAR), *Journal of Geophysical Research: Atmospheres*, 107, ACL 6–1–ACL 6–16, <https://doi.org/10.1029/2000JD000274>, 2003a.
- Naithani, J., Gallée, H., and Schayes, G.: Marine air intrusion into the Adelie Land sector of East Antarctica: A study using the regional climate model (MAR), *Journal of Geophysical Research: Atmospheres*, 107, ACL 6–1–ACL 6–16, <https://doi.org/10.1029/2000JD000274>, 2003b.





- Nakanishi, M. and Niino, H.: An Improved Mellor–Yamada Level-3 Model: Its Numerical Stability and Application to a Regional Prediction of Advection Fog, *Boundary-Layer Meteorology*, 119, 397–407, <https://doi.org/10.1007/s10546-005-9030-8>, 2006.
- Nicolas, J. P. and Bromwich, D. H.: New Reconstruction of Antarctic Near-Surface Temperatures: Multidecadal Trends and Reliability of Global Reanalyses, *Journal of Climate*, 27, 8070–8093, <https://doi.org/10.1175/JCLI-D-13-00733.1>, 2014.
- Nygård, T., Valkonen, T., and Vihma, T.: Antarctic Low-Tropospheric Humidity Inversions: 10-Yr Climatology, *Journal of Climate*, 26, 5205–5219, <https://doi.org/10.1175/JCLI-D-12-00446.1>, 2013.
- 10 Orr, A., Phillips, T., Webster, S., Elvidge, A., Weeks, M., Hosking, S., and Turner, J.: Met Office Unified Model high-resolution simulations of a strong wind event in Antarctica, *Quarterly Journal of the Royal Meteorological Society*, 140, 2287–2297, <https://doi.org/10.1002/qj.2296>, 2014.
- Parish, T. R. and Bromwich, D. H.: The surface windfield over the Antarctic ice sheets, *Nature*, 328, 51–54, 1987.
- Parish, T. R. and Bromwich, D. H.: A Case Study of Antarctic Katabatic Wind Interaction with Large-Scale Forcing, *Monthly Weather Review*, 126, 199–209, [https://doi.org/10.1175/1520-0493\(1998\)126<0199:ACSOAK>2.0.CO;2](https://doi.org/10.1175/1520-0493(1998)126<0199:ACSOAK>2.0.CO;2), 1998.
- 15 Parish, T. R. and Bromwich, D. H.: Reexamination of the Near-Surface Airflow over the Antarctic Continent and Implications of Atmospheric Circulations at High Southern Latitudes, *Monthly Weather Rev*, 135, 1961–1973, [doi:10.1175/MWR3374.1](https://doi.org/10.1175/MWR3374.1), 2007.
- Parish, T. R. and Walker, R.: A re-examination of the winds of Adelie Land, Antarctica, *Aust Met Mag*, 55, 105–107, 2006.
- Parish, T. R., Pettré, P., and Wendler, G.: A numerical study of the diurnal variation of the Adelie Land katabatic wind regime, *Journal of Geophysical Research: Atmospheres*, 98, 12 933–12 947, <https://doi.org/10.1029/92JD02080>, 1993.
- 20 Pattyn, F., Matsuoka, K., and Berte, J.: Glacio-meteorological conditions in the vicinity of the Belgian Princess Elisabeth Station, Antarctica, *Antarctic Science*, 22, 79–85, <https://doi.org/10.1017/S0954102009990344>, 2010.
- Pettré, P. and André, J.-C.: Surface-Pressure Change through Loewe’s Phenomena and Katabatic Flow Jumps: Study of Two Cases in Adélie Land, Antarctica, *Journal of the Atmospheric Sciences*, 48, 557–571, [https://doi.org/10.1175/1520-0469\(1991\)048<0557:SPCTLP>2.0.CO;2](https://doi.org/10.1175/1520-0469(1991)048<0557:SPCTLP>2.0.CO;2), 1991.
- 25 Pettré, P., Payan, C., and Parish, T. R.: Interaction of katabatic flow with local thermal effects in a coastal region of Adelie Land, east Antarctica, *Journal of Geophysical Research: Atmospheres*, 98, 10 429–10 440, <https://doi.org/10.1029/92JD02969>, 1993.
- Renfrew, I. A.: The dynamics of idealized katabatic flow over a moderate slope and ice shelf, *Quarterly Journal of the Royal Meteorological Society*, 130, 1023–1045, <https://doi.org/10.1256/qj.03.24>, 2004.
- 30 Renfrew, I. A. and Anderson, P. S.: Profiles of katabatic flow in summer and winter over Coats Land, Antarctica, *Quarterly Journal of the Royal Meteorological Society*, 132, 779–802, <https://doi.org/10.1256/qj.05.148>, 2007.
- Sanz Rodrigo, J., Buchlin, J.-M., van Beeck, J., Lenaerts, J. T. M., and van den Broeke, M. R.: Evaluation of the Antarctic surface wind climate from ERA reanalyses and RACMO2/ANT simulations based on automatic weather stations, *Climate Dynamics*, 40, 353–376, <https://doi.org/10.1007/s00382-012-1396-y>, 2013.
- 35 Seefeldt, M. W., Tripoli, G. J., and Stearns, C. R.: A High-Resolution Numerical Simulation of the Wind Flow in the Ross Island Region, Antarctica, *Monthly Weather Review*, 131, 435–458, [https://doi.org/10.1175/1520-0493\(2003\)131<0435:AHNRNSO>2.0.CO;2](https://doi.org/10.1175/1520-0493(2003)131<0435:AHNRNSO>2.0.CO;2), 2003.
- Sorbjan, Z., Kodama, Y., and Wendler, G.: Observational Study of the Atmospheric Boundary Layer over Antarctica, *Journal of Climate and Applied Meteorology*, 25, 641–651, <https://doi.org/10.1175/1520-0450>, 1986.
- Streten, N. A.: A review of the climate of Mawson - a representative strong wind site in East Antarctica, *Antarctic Science*, 2, 79–89, 1990.



- Tomasi, C., Petkov, B., Benedetti, E., Vitale, V., Pellegrini, A., Dargaud, G., De Silvestri, L., Grigioni, P., Fossat, E., Roth, W. L., and Valenziano, L.: Characterization of the atmospheric temperature and moisture conditions above Dome C (Antarctica) during austral summer and fall months, *J Geophys Res*, 111, doi:10.1029/2005JD006976, 2006.
- Turner, J., Lachlan-Cope, T. A., Marshall, G. J., Pendlebury, S., and Adams, N.: An extreme wind event at Casey Station, Antarctica, *J Geophys Res*, 106, 7291–7311, 2001.
- Uotila, P., Vihma, T., Pezza, A. B., Simmonds, I., Keay, K., and Lynch, A. H.: Relationships between Antarctic cyclones and surface conditions as derived from high-resolution numerical weather prediction data, *Journal of Geophysical Research: Atmospheres*, 116, <https://doi.org/10.1029/2010JD015358>, 2011.
- Van den Broeke, M. and Van Lipzig, N. P. M.: Factors Controlling the Near-Surface Wind Field in Antarctica, *Monthly Weather Review*, 21, 1417–1431, 2003.
- Van den Broeke, M. R., Lipzig, N. P. M. V., and Meijgaard, E. V.: Momentum Budget of the East Antarctic Atmospheric Boundary Layer: Results of a Regional Climate Model, *Journal of the Atmospheric Sciences*, 59, 3117–3129, [https://doi.org/10.1175/1520-0469\(2002\)059<3117:MBOTEA>2.0.CO;2](https://doi.org/10.1175/1520-0469(2002)059<3117:MBOTEA>2.0.CO;2), 2002.
- Van Lipzig, N. and Van Den Broeke, M.: A model study on the relation between atmospheric boundary-layer dynamics and poleward atmospheric moisture transport in Antarctica, *Tellus A: Dynamic Meteorology and Oceanography*, 54, 497–511, <https://doi.org/10.3402/tellusa.v54i5.12168>, 2002.
- van Wessem, J. M. and coauthors: Modelling the climate and surface mass balance of polar ice sheets using RACMO2. Part 2: Antarctica (1979–2016), *The Cryosphere*, 12, 1479–1498, doi: 10.5194/tc-12-1479-2018, 2018.
- Vignon, E., Hourdin, F., Genthon, C., Van de Wiel, B. J. H., Gallée, H., Madeleine, J.-B., and Beaumet, J.: Modeling the Dynamics of the Atmospheric Boundary Layer Over the Antarctic Plateau With a General Circulation Model, *Journal of Advances in Modeling Earth Systems*, 10.1002/2017MS001184, 2018.
- Wendler, G., André, J. C., Pettré, P., Gosink, J., and Parish, T.: Katabatic winds in Adélie Coast, Antarctica Meteorology and Climatology: Studies Based on Automatic Weather Stations, american Geophysical Union, Washington, D.C.. doi: 10.1029/AR061p0023, 1993.
- Yurchak, B. S.: An Assessment of Radiosonde Launch Conditions Affected by the Surface Wind, *Russian Meteorology and Hydrology*, 38, 159–167, 2013.
- Zhang, Y., Seidel, D. J., Golaz, J.-C., Deser, C., and Tomas, R. A.: Climatological Characteristics of Arctic and Antarctic Surface-Based Inversions, *Journal of Climate*, 24, 5167–5186, <https://doi.org/10.1175/2011JCLI4004.1>, 2011.
